# Supplementary material
Source: MDPI journal article supplement (https://www.mdpi.com/2073-4441/10/11/1508)
Supplement: s1 [file s1]

## Sheet: Benthos-GR taxalist
Table S1. The benthic-macroinvertebrate taxalist of the 380 microhabitats of the benthos-GR dataset (the derived metrics can be accessed at https://github.com/chtheodoro/benthos-GR)
Sample No.	Site No.	Site name	Sample code	Sampling date	TAXON_NAME	Aeshnidae	Ancylidae	Anthomyiidae	Athericidae	Baetidae	Blephariceridae	Caenidae	Capniidae	Ceratopogonidae	Chironomidae	Chloroperlidae	Coenagrionidae	Corixidae	Curculionidae	Dixidae	Dolichopodidae	Dryopidae	Dugesiidae	Dytiscidae	Elmidae	Empididae	Ephemerellidae	Ephemeridae	Ephydridae	Euphaeidae	Gammaridae	Glossosomatidae	Gomphidae	Gyrinidae	Helophoridae	Heptageniidae	Hydrachnidae	Hydraenidae	Hydrobiidae	Hydrochidae	Hydrometridae	Hydrophilidae	Hydropsychidae	Hydroptilidae	Lepidostomatidae	Leptoceridae	Leptophlebiidae	Leuctridae	Limnephilidae
1	1	Fouskari	FouSp1	2015-05-09	FouSp1	0	0	0	0	12	5	1	0	0	5	0	0	0	0	0	0	0	0	1	0	1	5	0	0	0	0	0	0	0	0	7	2	0	0	0	0	0	0	1	0	0	0	0	0
2	1	Fouskari	FouSp2	2015-05-09	FouSp2	0	0	0	0	16	0	2	0	0	1	0	0	0	0	0	0	0	0	0	1	0	9	0	0	0	0	0	0	0	0	12	0	0	0	0	0	0	0	0	0	0	0	0	0
3	1	Fouskari	FouSp3	2015-05-09	FouSp3	0	0	0	1	7	1	2	0	0	0	0	0	0	0	0	0	0	0	0	4	0	4	0	0	0	0	0	0	0	0	0	0	0	0	0	0	0	0	0	0	0	0	0	0
4	1	Fouskari	FouSp4	2015-05-09	FouSp4	0	0	0	0	34	0	2	0	0	5	0	0	0	0	0	0	0	0	0	5	0	12	0	0	0	0	0	0	0	0	14	0	1	0	0	0	0	0	0	0	0	0	1	0
5	1	Fouskari	FouSp5	2015-05-09	FouSp5	0	0	0	0	4	1	1	0	0	3	0	0	0	0	0	0	0	0	0	4	0	5	0	0	0	0	0	0	0	0	0	0	0	0	0	0	0	0	0	0	0	0	1	0
6	1	Fouskari	FouSp6	2015-05-09	FouSp6	0	0	0	1	5	0	0	0	0	3	0	0	0	0	0	0	0	0	0	0	0	0	0	0	0	0	0	0	0	0	1	0	0	0	0	1	0	0	0	0	0	0	0	0
7	1	Fouskari	FouSp7	2015-05-09	FouSp7	0	0	0	6	0	0	2	0	0	55	0	0	0	0	0	0	0	0	0	2	0	22	0	0	0	0	0	0	0	0	0	1	0	0	0	0	1	0	0	0	0	0	0	0
8	1	Fouskari	FouSp8	2015-05-09	FouSp8	0	0	0	1	11	4	2	0	0	0	0	0	0	0	0	0	0	0	0	2	0	9	0	1	0	0	0	0	0	1	5	0	0	0	0	0	0	1	2	0	0	0	3	0
9	1	Fouskari	FouSp9	2015-05-09	FouSp9	0	0	0	4	13	2	1	0	0	1	0	0	0	0	0	0	0	0	0	3	0	2	0	0	0	0	0	0	0	0	9	0	0	0	0	0	0	0	1	0	0	0	0	0
10	1	Fouskari	FouSp10	2015-05-09	FouSp10	0	0	0	1	8	1	1	0	0	2	0	0	0	0	0	0	0	0	0	1	0	4	0	0	0	0	0	0	0	0	4	0	0	0	0	0	0	0	0	0	0	0	1	0
11	1	Fouskari	FouSp11	2015-05-09	FouSp11	0	0	0	0	20	1	0	0	0	5	0	0	0	0	0	0	0	0	0	6	0	7	0	0	0	0	0	0	0	0	13	3	0	0	0	0	0	0	0	0	0	0	3	0
12	1	Fouskari	FouSp12	2015-05-09	FouSp12	0	0	0	1	9	0	1	0	0	0	0	0	0	0	0	0	0	0	0	1	0	0	0	0	0	0	0	0	0	0	4	0	0	0	0	0	0	0	0	0	0	0	0	0
13	1	Fouskari	FouSp13	2015-05-09	FouSp13	0	0	0	1	25	1	3	0	1	9	0	0	0	0	0	0	0	0	0	4	0	22	0	0	0	0	0	0	0	0	16	1	0	0	0	0	0	0	0	0	0	0	1	0
14	1	Fouskari	FouSp14	2015-05-09	FouSp14	0	0	0	2	0	0	0	0	0	3	0	0	0	0	0	0	0	0	0	6	1	0	0	0	0	0	0	0	0	0	0	0	1	0	0	0	0	0	0	0	0	0	0	0
15	1	Fouskari	FouSp15	2015-05-09	FouSp15	0	0	0	2	13	1	0	0	0	5	0	0	0	0	0	0	0	0	0	9	0	2	0	0	0	0	0	0	0	0	4	0	0	0	0	0	0	0	0	0	0	0	5	0
16	1	Fouskari	FouSp16	2015-05-09	FouSp16	0	0	0	0	5	0	0	0	0	3	0	0	0	0	0	0	0	0	0	5	1	8	0	0	0	0	0	0	0	0	17	0	3	0	0	0	0	0	3	0	0	0	1	0
17	1	Fouskari	FouSp17	2015-05-09	FouSp17	0	0	0	0	20	3	3	0	0	3	0	0	0	0	1	0	0	0	0	3	0	11	0	0	0	0	0	0	0	0	12	1	0	0	0	0	0	0	2	0	0	0	0	0
18	1	Fouskari	FouSp18	2015-05-09	FouSp18	0	0	0	0	7	2	0	0	0	1	0	0	0	0	0	0	0	0	0	4	0	1	0	0	0	0	0	0	0	0	3	0	0	0	0	0	0	0	0	0	0	0	0	0
19	1	Fouskari	FouSp19	2015-05-09	FouSp19	0	0	0	0	3	1	1	0	0	1	0	0	0	0	0	0	0	0	0	2	0	3	0	0	0	0	0	0	0	0	14	0	0	0	0	0	0	0	0	0	0	0	0	0
20	1	Fouskari	FouSp20	2015-05-09	FouSp20	0	0	0	1	1	0	0	0	0	5	0	0	0	0	0	0	0	0	0	1	0	1	0	0	0	0	0	0	0	0	1	0	0	0	0	0	0	0	0	0	0	0	0	0
21	3	Ag. Dimitrios	AgDSp1	2015-05-16	AgDSp1	0	0	0	0	16	0	1	0	0	16	0	0	0	0	0	0	0	0	0	0	1	14	0	0	0	0	0	0	0	0	4	2	1	0	0	0	0	0	0	0	0	0	9	0
22	3	Ag. Dimitrios	AgDSp2	2015-05-16	AgDSp2	0	0	0	0	38	0	5	0	0	133	0	0	0	0	0	0	0	0	0	1	3	24	0	0	0	0	0	0	0	0	3	0	1	0	0	0	0	0	0	0	0	0	27	0
23	3	Ag. Dimitrios	AgDSp3	2015-05-16	AgDSp3	0	0	0	1	74	0	6	0	0	37	0	0	0	0	0	0	0	0	0	0	5	18	0	0	0	0	0	0	0	0	7	0	2	0	0	0	0	1	2	0	0	0	11	0
24	3	Ag. Dimitrios	AgDSp4	2015-05-16	AgDSp4	0	0	0	0	54	0	0	0	0	8	0	0	0	0	1	0	0	0	0	0	0	7	0	0	0	0	0	0	0	0	20	0	0	0	0	0	0	0	0	0	0	0	3	0
25	3	Ag. Dimitrios	AgDSp5	2015-05-16	AgDSp5	0	0	0	0	16	0	0	0	0	1	0	0	0	0	0	0	0	0	0	0	1	5	0	0	0	0	0	0	0	0	1	0	0	0	0	0	0	0	2	0	0	0	0	0
26	3	Ag. Dimitrios	AgDSp6	2015-05-16	AgDSp6	0	0	0	0	39	0	0	0	0	17	0	0	0	0	0	0	0	0	0	0	0	5	0	0	0	0	0	0	0	0	1	0	0	0	0	0	0	2	0	0	0	0	0	0
27	3	Ag. Dimitrios	AgDSp7	2015-05-16	AgDSp7	0	0	0	0	25	0	21	0	0	12	0	0	0	0	0	0	0	0	0	3	0	13	0	0	0	0	0	2	0	0	8	0	0	0	0	0	0	3	0	0	0	0	6	0
28	3	Ag. Dimitrios	AgDSp8	2015-05-16	AgDSp8	0	0	0	0	39	0	3	0	0	2	0	0	0	0	0	0	0	0	0	5	0	8	0	0	0	0	0	0	0	0	9	0	2	0	0	0	0	1	0	0	0	0	1	0
29	3	Ag. Dimitrios	AgDSp9	2015-05-16	AgDSp9	0	0	0	0	1	0	2	0	0	10	0	0	0	0	0	0	0	0	0	0	0	0	1	0	0	0	0	0	0	0	0	0	0	0	0	0	0	0	0	0	0	0	2	0
30	3	Ag. Dimitrios	AgDSp10	2015-05-16	AgDSp10	0	0	0	0	24	0	10	0	0	21	0	0	0	0	0	0	0	0	0	2	1	5	0	0	0	0	0	0	0	0	14	0	0	0	0	0	0	0	0	0	0	0	29	0
31	3	Ag. Dimitrios	AgDSp11	2015-05-16	AgDSp11	0	0	0	0	34	0	5	0	0	4	0	0	0	0	0	0	0	0	0	0	0	3	0	0	0	0	0	0	0	0	10	0	1	0	0	0	0	0	0	0	0	0	5	0
32	3	Ag. Dimitrios	AgDSp12	2015-05-16	AgDSp12	0	0	0	0	146	0	7	0	1	101	0	0	0	0	0	0	0	0	0	5	4	37	0	0	0	0	0	1	0	0	13	0	4	0	0	0	0	2	0	0	0	0	83	0
33	3	Ag. Dimitrios	AgDSp13	2015-05-16	AgDSp13	0	0	1	0	53	0	9	0	2	42	0	0	0	0	0	0	0	0	0	1	3	66	0	0	0	0	2	0	0	1	6	3	4	0	0	0	0	1	0	0	0	0	13	0
34	3	Ag. Dimitrios	AgDSp14	2015-05-16	AgDSp14	0	0	0	0	63	0	1	0	0	15	0	0	0	0	0	0	0	0	0	0	1	6	0	0	0	0	0	0	0	0	12	0	0	0	0	0	0	0	0	0	0	0	3	0
35	3	Ag. Dimitrios	AgDSp15	2015-05-16	AgDSp15	0	0	0	0	49	0	2	0	1	0	0	0	0	0	0	0	0	0	0	0	0	8	0	0	0	0	0	0	0	0	3	0	1	0	0	0	0	0	0	0	0	0	7	0
36	3	Ag. Dimitrios	AgDSp16	2015-05-16	AgDSp16	0	0	0	0	33	0	1	0	0	16	0	0	0	0	0	0	0	0	0	0	0	11	0	0	0	0	0	0	0	0	0	0	1	0	0	0	0	0	0	0	0	0	2	0
37	3	Ag. Dimitrios	AgDSp17	2015-05-16	AgDSp17	0	0	0	0	37	0	7	0	0	40	0	0	0	1	0	0	0	0	0	1	0	11	0	0	0	0	2	0	0	0	9	0	0	0	0	0	0	1	0	0	0	0	4	0
38	3	Ag. Dimitrios	AgDSp18	2015-05-16	AgDSp18	0	0	0	0	66	0	2	0	0	34	0	0	0	0	0	0	0	0	0	1	0	6	0	0	0	0	2	0	0	0	12	1	3	0	0	0	0	1	0	0	0	0	0	0
39	3	Ag. Dimitrios	AgDSp19	2015-05-16	AgDSp19	0	0	0	0	74	0	2	0	0	24	0	0	0	0	0	0	0	0	0	2	0	9	0	0	0	0	2	0	0	0	11	0	1	0	0	0	0	2	0	0	0	0	5	0
40	3	Ag. Dimitrios	AgDSp20	2015-05-16	AgDSp20	0	0	0	0	97	0	1	0	0	17	0	0	0	0	0	0	0	0	0	0	1	22	0	0	0	0	0	0	0	0	9	0	0	0	0	0	0	1	0	0	0	0	3	0
41	4	Parapeiros_W	ParWSp1	2015-05-17	ParWSp1	0	0	0	0	3	0	3	0	0	16	0	0	0	0	0	0	0	0	0	1	0	3	0	0	1	0	2	1	0	0	0	0	0	0	0	0	0	12	0	0	0	0	0	0
42	4	Parapeiros_W	ParWSp2	2015-05-17	ParWSp2	0	0	0	0	7	0	2	0	0	2	0	0	0	0	0	0	0	0	0	0	0	0	0	0	0	0	0	1	0	0	0	0	0	0	0	0	0	7	0	0	0	0	0	0
43	4	Parapeiros_W	ParWSp3	2015-05-17	ParWSp3	0	0	0	0	20	0	9	0	0	20	0	0	0	0	0	0	0	0	0	1	0	1	0	0	0	0	0	2	0	0	0	0	3	0	0	0	0	29	0	0	0	0	5	0
44	4	Parapeiros_W	ParWSp4	2015-05-17	ParWSp4	0	0	0	0	3	0	4	0	0	0	0	0	0	0	0	0	0	0	0	1	0	0	0	0	0	0	0	1	0	0	0	0	0	0	0	0	0	1	0	0	0	0	0	0
45	4	Parapeiros_W	ParWSp5	2015-05-17	ParWSp5	0	0	0	0	33	0	1	0	0	2	0	0	0	0	0	0	0	0	0	1	0	2	0	0	0	0	0	2	0	0	1	0	1	0	0	0	0	22	0	0	0	0	0	0
46	4	Parapeiros_W	ParWSp6	2015-05-17	ParWSp6	0	0	0	0	2	0	5	0	0	0	0	0	0	0	0	0	0	0	0	0	0	1	0	0	0	0	0	2	0	0	4	2	0	0	0	0	0	7	0	0	0	0	1	0
47	4	Parapeiros_W	ParWSp7	2015-05-17	ParWSp7	0	0	0	0	11	0	0	0	0	10	0	0	0	0	0	0	0	0	0	0	0	1	0	0	0	0	0	2	0	0	0	2	0	0	0	0	0	4	0	0	0	0	0	0
48	4	Parapeiros_W	ParWSp8	2015-05-17	ParWSp8	0	0	0	0	4	0	5	0	0	1	0	0	0	0	0	0	0	0	0	0	0	0	0	0	0	0	0	0	0	0	0	0	0	0	0	0	0	1	0	0	0	0	1	0
49	4	Parapeiros_W	ParWSp9	2015-05-17	ParWSp9	0	0	0	0	3	0	0	0	0	3	0	0	0	0	0	0	0	0	0	0	0	5	0	0	0	0	1	0	0	0	0	1	0	0	0	0	0	1	1	0	0	0	0	0
50	4	Parapeiros_W	ParWSp10	2015-05-17	ParWSp10	0	0	0	0	15	0	3	0	0	17	0	0	0	0	0	0	0	0	0	1	0	0	0	0	0	0	1	0	0	0	3	1	0	0	0	0	0	17	0	0	0	0	0	0
51	4	Parapeiros_W	ParWSp11	2015-05-17	ParWSp11	0	0	0	0	0	0	0	0	0	2	0	0	0	0	0	0	0	0	0	0	0	1	0	0	0	0	0	0	0	0	0	0	1	0	0	0	0	1	0	0	0	0	0	0
52	4	Parapeiros_W	ParWSp12	2015-05-17	ParWSp12	0	0	0	1	3	0	10	0	0	2	0	0	0	0	0	0	0	0	0	0	0	2	0	0	0	0	0	0	0	0	1	1	0	0	0	0	0	2	0	0	0	0	0	0
53	4	Parapeiros_W	ParWSp13	2015-05-17	ParWSp13	0	0	0	0	4	0	0	0	0	0	0	0	0	0	0	0	0	0	0	0	0	1	0	0	0	0	0	1	0	0	5	0	0	0	0	0	0	3	0	0	0	0	0	0
54	4	Parapeiros_W	ParWSp14	2015-05-17	ParWSp14	0	0	0	0	1	0	0	0	0	3	0	0	0	0	0	0	1	0	0	0	0	0	0	0	0	0	1	1	0	0	3	0	1	0	0	0	0	2	0	0	0	1	0	0
55	4	Parapeiros_W	ParWSp15	2015-05-17	ParWSp15	0	0	0	0	3	0	1	0	0	1	0	0	0	0	0	0	0	0	0	0	0	0	0	0	0	0	2	2	0	0	2	0	2	0	0	0	0	5	0	0	0	0	0	0
56	4	Parapeiros_W	ParWSp16	2015-05-17	ParWSp16	0	0	0	0	13	0	12	0	0	23	0	0	0	0	0	0	0	0	0	1	1	0	0	0	0	0	1	3	0	0	4	1	0	0	0	0	0	26	0	0	0	0	1	0
57	4	Parapeiros_W	ParWSp17	2015-05-17	ParWSp17	0	0	0	0	0	0	1	0	0	0	0	0	0	0	0	0	0	0	0	0	0	0	0	0	0	0	0	2	0	0	1	1	0	0	0	0	0	4	0	0	0	0	0	0
58	4	Parapeiros_W	ParWSp18	2015-05-17	ParWSp18	0	0	0	0	5	0	2	0	0	3	0	0	0	0	0	0	0	0	0	0	0	0	0	0	0	0	0	0	0	0	3	0	0	0	0	0	0	1	0	0	0	0	3	0
59	4	Parapeiros_W	ParWSp19	2015-05-17	ParWSp19	0	0	0	0	4	0	0	0	0	6	0	0	0	0	0	0	0	0	0	1	0	3	0	0	0	0	0	2	0	0	3	0	0	0	0	0	0	3	0	0	0	0	0	0
60	4	Parapeiros_W	ParWSp20	2015-05-17	ParWSp20	0	0	0	0	5	0	16	0	1	13	0	0	0	0	0	0	0	0	0	0	0	1	0	0	0	0	0	0	0	0	1	2	0	0	0	0	0	4	0	0	0	0	0	0
61	5	Evinos_Up	EviSp1	2015-05-11	EviSp1	0	0	0	0	1	0	0	0	0	2	0	0	0	0	0	0	0	0	0	0	0	0	0	0	0	0	0	0	0	0	9	0	0	0	0	0	0	0	0	0	0	0	0	0
62	5	Evinos_Up	EviSp2	2015-05-11	EviSp2	0	0	0	0	4	0	0	0	0	1	1	0	0	0	0	0	0	0	0	0	0	0	0	0	0	0	0	0	0	0	0	0	0	0	0	0	0	0	0	0	0	0	0	0
63	5	Evinos_Up	EviSp3	2015-05-11	EviSp3	0	0	0	0	0	0	0	0	0	1	0	0	0	0	0	0	0	0	0	0	0	0	0	0	0	0	0	0	0	0	1	0	0	0	0	0	0	0	0	0	0	0	0	0
64	5	Evinos_Up	EviSp4	2015-05-11	EviSp4	0	0	0	0	6	0	0	0	0	3	0	0	0	0	0	0	0	0	0	2	0	0	0	0	0	0	0	0	0	0	6	0	0	0	0	0	0	1	0	0	0	0	0	0
65	5	Evinos_Up	EviSp5	2015-05-11	EviSp5	0	0	0	0	7	0	0	0	0	0	0	0	0	0	0	0	0	0	0	0	0	0	0	0	0	0	0	0	0	0	5	0	0	0	0	0	0	0	0	0	0	0	0	0
66	5	Evinos_Up	EviSp6	2015-05-11	EviSp6	0	0	0	0	21	0	0	0	0	7	0	0	0	0	0	0	0	0	0	0	0	1	0	0	0	0	0	0	0	0	6	0	0	0	0	0	0	2	0	0	0	0	0	0
67	5	Evinos_Up	EviSp7	2015-05-11	EviSp7	0	0	0	0	2	0	0	0	0	1	0	0	0	0	0	0	0	0	0	0	0	0	0	0	0	0	0	0	0	0	0	0	0	0	0	0	0	1	0	0	0	1	0	0
68	5	Evinos_Up	EviSp8	2015-05-11	EviSp8	0	0	0	0	1	0	0	0	0	0	0	0	0	0	0	0	0	0	0	0	0	0	0	0	0	0	0	0	0	0	0	0	0	0	0	0	0	0	0	0	0	0	0	0
69	5	Evinos_Up	EviSp9	2015-05-11	EviSp9	0	0	0	0	5	0	0	0	0	1	0	0	0	0	0	0	0	0	0	0	0	0	0	0	0	0	0	0	0	0	7	0	0	0	0	0	0	1	0	0	0	1	0	0
70	5	Evinos_Up	EviSp10	2015-05-11	EviSp10	0	0	0	0	0	0	0	0	0	1	0	0	0	0	0	0	0	0	0	0	0	0	0	0	0	0	0	0	0	0	5	0	0	0	0	0	0	0	0	0	0	0	0	0
71	5	Evinos_Up	EviSp11	2015-05-11	EviSp11	0	0	0	1	0	0	0	0	0	0	0	0	0	0	0	0	0	0	0	0	0	0	0	0	0	0	0	0	0	0	2	0	0	0	0	0	0	0	0	0	0	0	0	0
72	5	Evinos_Up	EviSp12	2015-05-11	EviSp12	0	0	0	0	1	0	0	0	0	0	0	0	0	0	0	0	0	0	0	0	0	0	0	0	0	0	0	0	0	0	1	0	0	0	0	0	0	0	0	0	0	0	0	0
73	5	Evinos_Up	EviSp13	2015-05-11	EviSp13	0	0	0	0	0	0	0	0	0	0	2	0	0	0	0	0	0	0	0	0	0	0	0	0	0	0	0	0	0	0	1	0	0	0	0	0	0	0	0	0	0	0	0	0
74	5	Evinos_Up	EviSp14	2015-05-11	EviSp14	0	0	0	1	1	0	0	0	0	3	0	0	0	0	0	0	0	0	0	0	1	0	0	0	0	0	0	0	0	0	5	0	0	0	0	0	0	0	0	0	0	0	0	0
75	5	Evinos_Up	EviSp15	2015-05-11	EviSp15	0	0	0	1	1	0	0	0	0	3	0	0	0	0	0	0	0	0	0	0	0	0	0	0	0	0	0	0	0	0	3	0	0	0	0	0	0	0	0	0	0	0	0	0
76	5	Evinos_Up	EviSp16	2015-05-11	EviSp16	0	0	0	0	1	0	0	0	0	0	0	0	0	0	0	0	0	0	0	0	0	0	0	0	0	0	0	0	0	0	0	0	0	0	0	0	0	0	0	0	0	0	0	0
77	5	Evinos_Up	EviSp17	2015-05-11	EviSp17	0	0	0	0	5	0	0	0	0	0	0	0	0	0	0	0	0	0	0	2	0	0	0	0	0	0	0	0	0	0	4	0	0	0	0	0	0	0	0	0	0	0	0	0
78	5	Evinos_Up	EviSp18	2015-05-11	EviSp18	0	0	0	0	0	0	0	0	1	5	0	0	0	0	0	0	0	0	0	3	0	3	0	0	0	0	0	0	0	0	24	0	0	0	0	0	0	0	0	0	0	0	1	0
79	5	Evinos_Up	EviSp19	2015-05-11	EviSp19	0	0	0	0	4	0	0	0	0	6	1	0	0	0	0	0	0	0	0	4	0	1	0	0	0	0	0	0	0	0	28	0	0	0	0	0	0	0	0	0	0	1	0	0
80	5	Evinos_Up	EviSp20	2015-05-11	EviSp20	0	0	0	0	1	0	0	0	0	0	0	0	0	0	0	0	0	0	0	0	0	0	0	0	0	0	0	0	0	0	1	0	0	0	0	0	0	0	0	0	0	0	0	0
81	6	Mornos_Up	MorSp1	2015-05-10	MorSp1	0	0	0	0	1	0	0	0	0	0	0	0	0	1	0	0	0	0	0	1	0	1	0	0	0	0	1	0	0	0	0	0	0	0	0	0	0	1	0	0	0	0	0	0
82	6	Mornos_Up	MorSp2	2015-05-10	MorSp2	0	0	0	0	1	1	0	0	0	1	0	0	0	0	0	0	0	0	0	0	0	0	0	0	0	0	0	0	0	0	2	0	0	0	0	0	0	0	0	0	0	0	0	0
83	6	Mornos_Up	MorSp3	2015-05-10	MorSp3	0	0	0	0	0	0	0	0	0	0	0	0	0	0	0	0	0	0	0	0	0	0	0	0	0	0	0	0	0	0	0	0	0	0	0	0	0	0	0	0	0	0	0	0
84	6	Mornos_Up	MorSp4	2015-05-10	MorSp4	0	0	0	0	2	0	0	0	0	0	0	0	0	0	0	0	0	0	0	0	0	0	0	0	0	0	0	0	0	0	2	0	0	0	0	0	0	1	0	0	0	0	0	0
85	6	Mornos_Up	MorSp5	2015-05-10	MorSp5	0	0	0	0	2	0	0	0	0	0	0	0	0	0	0	0	0	0	0	0	0	0	0	0	0	0	0	0	0	0	0	0	0	0	0	0	0	0	0	0	0	0	0	0
86	6	Mornos_Up	MorSp6	2015-05-10	MorSp6	0	0	0	0	1	0	0	0	0	0	0	0	0	0	0	0	0	0	0	1	0	1	0	0	0	0	2	0	0	0	3	0	0	0	0	0	0	1	0	0	0	0	0	0
87	6	Mornos_Up	MorSp7	2015-05-10	MorSp7	0	0	0	0	1	0	0	0	0	2	0	0	0	0	0	0	0	0	0	1	0	2	0	0	0	0	0	0	0	0	0	0	0	0	0	0	0	1	0	0	0	0	0	0
88	6	Mornos_Up	MorSp8	2015-05-10	MorSp8	0	0	0	0	1	0	0	0	0	1	0	0	0	0	0	0	0	0	0	0	0	0	0	0	0	0	0	0	0	0	0	0	0	0	0	0	0	0	0	0	0	0	0	0
89	6	Mornos_Up	MorSp9	2015-05-10	MorSp9	0	0	0	0	6	0	0	0	0	0	0	0	0	0	0	0	0	0	0	0	1	3	0	0	0	0	0	1	0	0	0	0	0	0	0	0	0	1	0	0	0	0	0	0
90	6	Mornos_Up	MorSp10	2015-05-10	MorSp10	0	0	0	0	1	0	0	0	0	2	0	0	0	0	0	0	0	0	0	0	0	0	0	0	0	0	0	0	0	0	0	0	0	0	0	0	0	1	0	0	0	0	0	0
91	6	Mornos_Up	MorSp11	2015-05-10	MorSp11	0	0	0	0	0	0	0	0	0	2	0	0	0	0	0	0	0	0	0	0	0	0	0	0	0	0	0	0	0	0	8	0	0	0	0	0	0	0	0	0	0	0	0	0
92	6	Mornos_Up	MorSp12	2015-05-10	MorSp12	0	0	0	0	0	0	0	0	0	2	0	0	5	0	0	0	0	0	0	0	0	1	0	0	0	0	0	0	0	0	0	0	0	0	0	0	0	0	0	0	0	0	0	0
93	6	Mornos_Up	MorSp13	2015-05-10	MorSp13	0	0	0	0	0	0	1	0	0	1	0	0	0	0	0	0	0	0	0	0	0	1	0	0	0	0	0	0	0	0	1	0	0	0	0	0	0	0	0	0	0	0	0	0
94	6	Mornos_Up	MorSp14	2015-05-10	MorSp14	0	0	0	0	0	0	4	0	0	9	0	0	17	0	0	0	0	0	0	0	0	1	0	0	0	0	0	1	0	0	0	0	0	0	0	0	0	0	0	0	0	0	0	0
95	6	Mornos_Up	MorSp15	2015-05-10	MorSp15	0	0	0	0	0	0	0	0	0	1	0	0	0	0	0	0	0	0	0	0	0	0	0	0	0	0	0	0	0	0	2	0	0	0	0	0	0	0	0	0	0	0	0	0
96	6	Mornos_Up	MorSp16	2015-05-10	MorSp16	0	0	0	0	0	0	0	0	0	1	0	0	0	0	0	0	0	0	0	0	0	1	0	0	0	0	0	0	0	0	0	0	0	0	0	0	0	0	0	0	1	0	0	0
97	6	Mornos_Up	MorSp17	2015-05-10	MorSp17	0	0	0	2	0	0	0	0	0	0	0	0	0	0	0	0	0	0	0	0	0	1	0	0	0	0	0	0	0	0	1	0	0	0	0	0	0	0	0	0	0	0	0	0
98	6	Mornos_Up	MorSp18	2015-05-10	MorSp18	0	0	0	0	2	0	0	0	0	3	0	0	0	0	0	0	0	0	0	1	0	1	0	0	0	0	0	0	0	0	1	0	0	0	0	0	0	1	0	0	0	0	0	0
99	6	Mornos_Up	MorSp19	2015-05-10	MorSp19	0	0	0	3	3	0	1	0	0	0	0	0	0	0	0	0	0	0	0	0	0	0	0	0	0	0	0	0	0	0	1	1	0	0	0	0	0	0	0	0	0	0	0	0
100	6	Mornos_Up	MorSp20	2015-05-10	MorSp20	0	0	0	2	4	0	0	0	0	0	0	0	0	0	0	0	0	0	0	0	0	0	0	0	0	0	0	0	0	0	0	0	0	0	0	0	0	1	0	0	1	0	0	0
101	7	Per06.1	Per06Sp1	2015-05-12	Per06Sp1	0	0	0	2	5	0	0	0	0	11	0	0	0	0	0	0	0	0	0	0	0	5	0	0	0	0	0	0	0	0	2	0	0	0	0	0	0	1	0	0	0	7	0	0
102	7	Per06.1	Per06Sp2	2015-05-12	Per06Sp2	0	0	0	0	6	0	0	0	0	19	0	0	0	0	0	0	0	0	0	0	1	4	0	0	0	0	0	0	0	0	3	0	0	0	0	0	0	0	0	0	0	0	0	0
103	7	Per06.1	Per06Sp3	2015-05-12	Per06Sp3	0	0	0	0	4	0	0	0	0	9	0	0	0	0	0	0	0	0	0	1	0	3	0	0	0	0	0	0	0	0	2	0	0	0	0	0	0	0	0	0	0	7	0	0
104	7	Per06.1	Per06Sp4	2015-05-12	Per06Sp4	0	0	0	1	22	0	0	0	0	52	0	0	0	0	0	0	0	0	0	0	1	11	0	0	0	0	6	0	0	0	0	0	0	0	0	0	0	1	0	0	0	0	0	8
105	7	Per06.1	Per06Sp5	2015-05-12	Per06Sp5	0	0	0	1	51	0	0	0	0	15	0	0	0	0	0	0	0	0	0	1	0	22	0	0	0	0	0	0	0	0	13	0	1	0	0	0	0	0	0	0	0	2	1	0
106	7	Per06.1	Per06Sp6	2015-05-12	Per06Sp6	0	0	0	0	28	0	0	0	0	13	0	0	0	0	0	0	0	0	0	2	0	7	0	0	0	0	0	0	0	0	2	0	0	0	0	0	0	0	0	0	0	0	0	0
107	7	Per06.1	Per06Sp7	2015-05-12	Per06Sp7	0	0	0	13	22	0	0	0	0	17	0	0	0	0	0	0	0	0	0	0	0	21	0	0	0	0	0	0	0	0	11	0	0	0	0	0	0	0	0	0	0	1	0	0
108	7	Per06.1	Per06Sp8	2015-05-12	Per06Sp8	0	0	0	3	20	0	0	0	0	15	0	0	0	0	0	0	0	0	0	1	0	19	0	0	0	0	0	0	0	0	5	0	0	0	0	0	0	0	0	0	0	0	0	1
109	7	Per06.1	Per06Sp9	2015-05-12	Per06Sp9	0	0	0	1	22	0	0	0	0	16	0	0	0	0	0	0	0	0	0	1	0	20	0	0	0	0	0	0	0	0	5	0	0	0	0	0	0	1	0	0	0	3	0	0
110	7	Per06.1	Per06Sp10	2015-05-12	Per06Sp10	0	0	0	7	6	0	0	0	0	6	0	0	0	0	0	0	0	0	0	0	0	5	0	0	0	0	0	0	0	0	0	0	0	0	0	0	0	0	0	0	0	2	0	0
111	7	Per06.1	Per06Sp11	2015-05-12	Per06Sp11	0	0	0	0	81	1	0	0	0	22	0	0	0	0	0	0	0	1	0	4	0	35	0	0	0	0	0	0	0	0	7	0	0	0	0	0	0	1	0	0	0	1	0	0
112	7	Per06.1	Per06Sp12	2015-05-12	Per06Sp12	0	0	0	0	68	0	0	0	0	16	0	0	0	0	0	0	0	0	0	1	0	30	0	0	0	0	0	0	0	0	9	0	3	0	0	0	0	2	0	0	0	3	0	0
113	7	Per06.1	Per06Sp13	2015-05-12	Per06Sp13	0	0	0	2	35	0	0	0	0	4	0	0	0	0	0	0	0	0	0	2	0	4	0	0	0	0	0	0	0	0	0	0	0	0	0	0	0	0	0	0	0	0	0	0
114	7	Per06.1	Per06Sp14	2015-05-12	Per06Sp14	0	0	0	2	75	0	0	0	0	10	0	0	0	0	0	0	0	1	0	3	0	29	0	0	0	0	0	0	0	0	16	0	2	0	0	0	0	5	0	0	0	2	0	0
115	7	Per06.1	Per06Sp15	2015-05-12	Per06Sp15	0	0	0	0	119	0	0	0	0	34	0	0	0	0	0	0	0	0	0	2	0	14	0	0	0	0	0	0	0	0	1	0	1	0	0	0	0	1	1	0	0	0	0	0
116	7	Per06.1	Per06Sp16	2015-05-12	Per06Sp16	0	0	0	5	48	1	0	0	0	31	0	0	0	0	0	0	0	1	0	1	0	7	0	0	0	0	0	0	0	0	5	0	0	0	0	0	0	1	0	0	0	0	0	0
117	7	Per06.1	Per06Sp17	2015-05-12	Per06Sp17	0	0	0	0	16	0	0	0	0	37	0	0	0	0	0	0	0	0	0	2	0	26	0	0	0	0	0	0	0	0	3	0	1	0	0	0	0	1	0	0	0	1	0	0
118	7	Per06.1	Per06Sp18	2015-05-12	Per06Sp18	0	0	0	0	59	2	0	0	0	100	0	0	0	0	0	0	0	0	0	2	0	12	0	0	0	0	0	0	0	0	6	0	1	0	0	0	0	1	0	0	0	3	0	2
119	7	Per06.1	Per06Sp19	2015-05-12	Per06Sp19	0	0	0	0	59	0	0	0	0	12	0	0	0	0	0	0	0	0	0	6	0	19	1	0	0	0	0	0	0	0	1	0	0	0	0	0	0	0	0	0	0	0	0	6
120	7	Per06.1	Per06Sp20	2015-05-12	Per06Sp20	0	0	0	0	55	0	0	0	0	18	0	0	0	0	0	0	0	0	0	2	0	11	0	0	0	0	0	0	0	0	5	0	0	0	0	0	0	0	0	0	0	0	0	0
121	8	SidePer10	SidePSp1	2015-05-12	SidePSp1	0	0	0	0	23	0	0	0	2	20	0	0	0	1	0	0	0	0	0	0	0	0	0	0	0	0	0	0	0	0	0	0	0	0	0	0	0	0	0	0	0	0	0	0
122	8	SidePer10	SidePSp2	2015-05-12	SidePSp2	0	0	0	0	7	1	0	0	0	43	0	0	0	0	0	0	0	0	0	0	0	0	0	0	0	0	1	0	0	0	7	0	0	0	0	0	0	0	0	0	0	0	0	0
123	8	SidePer10	SidePSp3	2015-05-12	SidePSp3	0	0	0	0	5	0	0	0	0	0	0	0	0	0	0	0	0	0	0	0	0	0	0	0	0	0	0	0	0	0	5	0	0	0	0	0	0	0	0	0	0	0	0	0
124	8	SidePer10	SidePSp4	2015-05-12	SidePSp4	0	0	0	0	0	0	0	0	0	7	0	0	0	0	0	0	0	0	0	0	0	0	0	0	0	0	0	0	0	0	2	0	0	0	0	0	0	0	0	0	0	0	0	0
125	8	SidePer10	SidePSp5	2015-05-12	SidePSp5	0	0	0	0	15	1	0	0	0	5	0	0	0	0	0	0	0	0	0	0	0	0	0	0	0	0	0	0	0	0	6	0	0	0	0	0	0	0	0	0	0	0	0	0
126	8	SidePer10	SidePSp6	2015-05-12	SidePSp6	0	0	0	0	2	0	0	0	0	2	0	0	0	0	0	0	0	0	0	0	0	0	0	0	0	0	0	0	0	0	0	0	0	0	0	0	0	0	0	0	0	0	0	0
127	8	SidePer10	SidePSp7	2015-05-12	SidePSp7	0	0	0	0	33	3	0	0	0	122	0	0	0	0	0	0	0	0	0	1	0	0	0	0	0	0	0	0	0	0	5	0	0	0	0	0	0	0	0	0	0	0	0	0
128	8	SidePer10	SidePSp8	2015-05-12	SidePSp8	0	0	0	0	8	1	0	0	0	56	0	0	0	0	0	0	0	0	0	0	0	1	0	0	0	0	0	0	0	0	6	0	0	0	0	0	0	0	0	0	0	0	0	0
129	8	SidePer10	SidePSp9	2015-05-12	SidePSp9	0	0	0	0	11	0	0	0	0	22	1	0	0	0	0	0	0	0	0	1	1	0	0	0	0	0	0	0	0	0	6	0	0	0	2	0	0	0	0	0	0	0	0	1
130	8	SidePer10	SidePSp10	2015-05-12	SidePSp10	0	0	0	0	33	1	0	0	0	39	0	0	0	0	0	0	0	0	0	0	1	0	0	0	0	0	0	0	0	0	3	0	0	0	0	0	0	0	0	0	0	0	0	0
131	8	SidePer10	SidePSp11	2015-05-12	SidePSp11	0	0	0	0	45	6	0	0	0	24	0	0	0	0	0	0	0	0	0	0	0	1	0	0	0	0	0	0	0	0	11	0	0	0	0	0	0	0	0	0	0	0	0	0
132	8	SidePer10	SidePSp12	2015-05-12	SidePSp12	0	0	0	0	28	3	0	0	0	32	0	0	0	0	0	0	0	0	0	0	0	1	0	0	0	0	0	0	0	0	24	0	0	0	0	0	0	0	0	0	0	0	0	0
133	8	SidePer10	SidePSp13	2015-05-12	SidePSp13	0	0	0	0	23	0	0	0	0	80	0	0	0	0	0	0	0	0	0	0	0	0	0	0	0	0	0	0	0	0	16	1	0	0	0	0	0	0	0	0	0	0	0	0
134	8	SidePer10	SidePSp14	2015-05-12	SidePSp14	0	0	0	0	56	0	0	0	0	217	0	0	0	1	0	0	0	0	0	0	0	0	0	0	0	0	0	0	0	0	5	0	0	0	0	0	0	0	0	0	0	0	0	0
135	8	SidePer10	SidePSp15	2015-05-12	SidePSp15	0	0	0	0	2	0	0	0	0	27	0	0	0	0	0	0	0	0	0	0	0	0	0	0	0	0	0	0	0	0	0	0	0	0	0	0	0	0	0	0	0	0	0	0
136	8	SidePer10	SidePSp16	2015-05-12	SidePSp16	0	0	0	0	21	0	0	0	0	35	0	0	0	0	0	0	0	0	0	0	0	0	0	0	0	0	0	0	0	0	2	0	0	0	0	0	0	0	0	0	0	0	0	0
137	8	SidePer10	SidePSp17	2015-05-12	SidePSp17	0	0	0	0	47	0	0	0	0	148	0	0	0	0	0	0	0	0	0	0	1	2	0	0	0	0	0	0	0	0	6	1	0	0	0	0	0	0	0	0	0	0	0	0
138	8	SidePer10	SidePSp18	2015-05-12	SidePSp18	0	0	0	0	28	0	0	0	0	49	0	0	0	0	0	0	0	0	0	0	0	0	0	0	0	0	0	0	0	0	6	0	0	0	0	0	0	0	0	0	0	0	0	0
139	8	SidePer10	SidePSp19	2015-05-12	SidePSp19	0	0	0	0	33	0	0	0	0	29	0	0	0	0	0	0	0	0	0	0	0	0	0	0	0	0	0	0	0	0	13	0	0	0	0	0	0	0	0	0	0	0	0	0
140	8	SidePer10	SidePSp20	2015-05-12	SidePSp20	0	0	0	1	15	0	0	0	0	3	0	0	0	0	0	0	0	0	0	0	1	0	0	0	0	0	0	0	0	0	6	0	0	0	0	0	0	0	0	0	0	0	1	0
141	9	Spilia	SpilSp1	2015-05-13	SpilSp1	0	0	0	0	28	0	0	0	0	9	0	0	0	0	0	0	0	0	0	0	0	7	0	0	0	0	0	0	0	0	28	0	0	0	0	0	0	1	0	0	0	0	0	0
142	9	Spilia	SpilSp2	2015-05-13	SpilSp2	0	0	0	1	13	0	0	0	1	11	0	0	0	0	0	0	0	0	0	0	0	3	0	0	0	0	0	0	0	0	9	0	0	0	0	0	0	1	0	0	0	0	0	0
143	9	Spilia	SpilSp3	2015-05-13	SpilSp3	0	0	0	0	3	0	0	0	1	5	0	0	0	0	0	0	0	0	0	0	0	2	0	0	0	0	0	0	0	0	9	0	0	0	0	0	0	0	0	0	0	0	0	0
144	9	Spilia	SpilSp4	2015-05-13	SpilSp4	0	0	0	0	27	0	0	0	0	21	0	0	0	0	0	0	0	0	0	0	0	6	0	0	0	0	0	0	0	0	5	0	0	0	0	0	0	2	0	0	0	0	0	0
145	9	Spilia	SpilSp5	2015-05-13	SpilSp5	0	0	0	0	2	1	0	0	0	1	0	0	0	0	0	0	0	0	0	0	0	0	0	0	0	0	0	0	0	0	1	0	0	0	0	0	0	0	0	0	0	0	0	0
146	9	Spilia	SpilSp6	2015-05-13	SpilSp6	0	0	0	0	8	0	0	0	0	7	0	0	0	0	0	0	0	0	0	1	0	3	0	0	0	0	0	0	0	0	50	0	0	0	0	0	0	0	0	0	0	0	0	0
147	9	Spilia	SpilSp7	2015-05-13	SpilSp7	0	0	0	1	5	0	0	0	0	27	0	0	0	0	0	0	0	0	0	0	0	1	0	0	0	0	0	0	0	0	2	0	0	0	0	0	0	1	0	0	0	0	0	0
148	9	Spilia	SpilSp8	2015-05-13	SpilSp8	0	0	0	1	19	1	0	0	0	26	0	0	0	0	0	0	0	0	0	0	0	3	0	0	0	0	1	0	0	0	22	0	0	0	0	0	0	0	0	0	0	0	0	0
149	9	Spilia	SpilSp9	2015-05-13	SpilSp9	0	0	0	1	14	0	0	0	2	16	0	0	0	0	0	0	0	0	0	0	0	11	0	0	0	0	0	0	0	0	12	0	0	0	0	0	0	0	0	0	0	0	0	0
150	9	Spilia	SpilSp10	2015-05-13	SpilSp10	0	0	0	0	9	0	0	0	0	3	0	0	0	0	0	0	0	0	0	0	0	0	0	0	0	0	0	0	0	0	11	0	0	0	0	0	0	0	0	0	0	0	0	0
151	9	Spilia	SpilSp11	2015-05-13	SpilSp11	0	0	0	0	18	0	0	0	2	24	0	0	0	0	0	0	0	0	0	0	0	9	0	0	0	0	0	0	0	0	30	0	0	0	0	0	0	1	0	0	0	0	0	0
152	9	Spilia	SpilSp12	2015-05-13	SpilSp12	0	0	0	2	50	0	0	0	0	32	0	0	0	0	0	0	0	0	0	1	0	8	0	0	0	0	1	0	0	0	15	0	0	0	0	0	0	0	0	0	0	0	0	0
153	9	Spilia	SpilSp13	2015-05-13	SpilSp13	0	0	0	0	52	0	0	0	0	8	0	0	0	0	0	0	0	0	0	0	0	11	0	0	0	0	0	0	0	0	24	0	1	0	0	0	0	1	0	0	0	0	0	0
154	9	Spilia	SpilSp14	2015-05-13	SpilSp14	0	0	0	0	13	0	0	0	0	8	0	0	0	0	0	0	0	0	0	1	0	6	0	0	0	0	0	0	0	0	7	0	0	0	0	0	0	0	0	0	0	0	0	0
155	9	Spilia	SpilSp15	2015-05-13	SpilSp15	0	0	0	0	2	0	0	0	0	10	0	0	0	0	0	0	0	0	0	0	0	0	0	0	0	0	0	0	0	0	6	0	0	0	0	0	0	0	0	0	0	0	0	0
156	9	Spilia	SpilSp16	2015-05-13	SpilSp16	0	0	0	0	25	0	0	0	0	9	0	0	0	0	0	0	0	0	0	0	0	2	0	0	0	0	0	0	0	0	7	0	1	0	0	0	0	1	0	0	0	0	0	0
157	9	Spilia	SpilSp17	2015-05-13	SpilSp17	0	0	0	0	8	1	0	0	0	2	0	0	0	0	0	0	0	0	0	0	0	3	0	0	0	0	0	0	0	0	14	0	0	0	0	0	0	0	0	0	0	0	0	0
158	9	Spilia	SpilSp18	2015-05-13	SpilSp18	0	0	0	0	3	0	0	0	0	9	0	0	0	0	0	0	0	0	0	0	0	0	0	0	0	0	0	0	0	0	11	0	0	0	0	0	0	2	0	0	0	0	0	0
159	9	Spilia	SpilSp19	2015-05-13	SpilSp19	0	0	0	0	7	0	0	0	1	19	0	0	0	0	0	0	0	0	0	0	0	7	0	0	0	0	0	0	0	0	3	0	1	0	0	0	0	0	0	0	0	1	0	0
160	9	Spilia	SpilSp20	2015-05-13	SpilSp20	0	0	0	0	8	0	0	0	1	43	0	0	0	0	0	0	0	0	0	0	0	0	0	0	0	0	0	0	0	0	3	0	0	0	0	0	0	0	0	0	0	0	0	0
161	1	Fouskari	FouSu1	2015-08-24	FouSu1	0	0	0	0	1	0	0	0	0	2	0	0	0	0	0	0	0	0	0	0	0	0	0	0	0	0	0	0	0	0	0	0	0	0	0	0	0	0	1	0	0	0	0	0
162	1	Fouskari	FouSu2	2015-08-24	FouSu2	0	0	0	1	5	0	0	0	0	5	0	0	0	0	0	0	0	0	0	3	1	0	0	0	0	0	0	0	0	0	0	0	0	0	0	0	0	0	4	0	0	0	2	0
163	1	Fouskari	FouSu3	2015-08-24	FouSu3	1	0	0	6	0	0	1	0	1	7	0	0	0	0	0	0	0	0	0	3	0	0	0	0	0	0	0	0	0	0	1	0	0	0	0	0	0	0	2	0	0	0	20	0
164	1	Fouskari	FouSu4	2015-08-24	FouSu4	0	0	0	0	2	0	1	0	1	0	0	0	0	0	0	0	0	0	0	0	0	0	0	0	0	0	0	0	0	0	0	0	0	0	0	0	0	0	0	0	0	0	0	0
165	1	Fouskari	FouSu5	2015-08-24	FouSu5	0	0	0	2	8	0	1	0	0	0	0	0	0	0	0	0	0	0	0	2	0	0	0	0	0	0	0	0	0	0	1	0	0	0	0	0	0	0	0	0	0	0	2	0
166	1	Fouskari	FouSu6	2015-08-24	FouSu6	0	0	0	0	0	0	0	0	0	1	0	0	0	0	0	0	0	0	0	0	0	0	0	0	0	0	0	0	0	0	0	0	0	0	0	0	0	1	0	0	0	0	3	0
167	1	Fouskari	FouSu7	2015-08-24	FouSu7	0	0	0	0	4	0	0	0	0	0	0	0	0	0	0	0	0	0	0	1	0	0	0	0	0	0	0	0	0	0	0	0	0	0	0	0	0	1	0	0	0	0	5	0
168	1	Fouskari	FouSu8	2015-08-24	FouSu8	0	0	0	0	0	0	0	0	0	0	0	0	0	0	0	0	0	0	0	0	0	0	0	0	0	0	0	0	0	0	1	0	0	0	0	0	0	0	0	0	0	0	0	0
169	1	Fouskari	FouSu9	2015-08-24	FouSu9	0	0	0	0	14	0	0	0	0	0	0	0	0	0	0	0	0	0	0	2	0	0	0	0	0	0	0	0	0	1	0	0	0	0	0	0	0	0	0	0	0	0	0	0
170	1	Fouskari	FouSu10	2015-08-24	FouSu10	0	0	0	0	11	0	0	0	0	0	0	0	0	0	0	0	0	0	0	0	0	0	0	0	0	0	0	0	0	0	0	0	0	0	0	0	0	0	0	0	0	0	1	0
171	1	Fouskari	FouSu11	2015-08-24	FouSu11	0	0	0	0	19	0	0	0	0	0	0	0	0	0	0	0	0	0	0	3	0	0	0	0	0	0	0	0	0	0	2	0	0	0	0	0	0	0	0	0	0	0	2	0
172	1	Fouskari	FouSu12	2015-08-24	FouSu12	0	0	0	0	8	0	1	0	0	4	0	0	0	0	0	0	0	0	0	1	0	0	0	0	0	0	0	0	0	0	1	0	0	0	0	0	0	2	0	0	0	0	0	0
173	1	Fouskari	FouSu13	2015-08-24	FouSu13	0	0	0	0	0	0	6	0	0	1	0	0	0	0	0	0	0	0	0	2	0	0	0	0	0	0	0	0	0	0	0	0	1	0	0	0	0	0	0	0	0	0	1	0
174	1	Fouskari	FouSu14	2015-08-24	FouSu14	0	0	0	1	25	0	1	0	0	5	0	0	0	0	0	0	0	0	0	0	0	0	0	0	0	0	0	0	0	0	7	0	2	0	0	0	0	7	0	0	0	0	14	0
175	1	Fouskari	FouSu15	2015-08-24	FouSu15	0	0	0	0	4	0	1	0	0	0	0	0	0	0	0	0	0	0	0	2	0	0	0	0	0	0	0	0	0	0	1	0	0	0	0	0	0	1	0	0	0	0	4	0
176	1	Fouskari	FouSu16	2015-08-24	FouSu16	0	0	0	1	28	0	0	0	0	1	0	0	0	0	0	0	0	0	0	4	0	1	0	0	0	1	0	0	0	0	8	0	2	0	0	0	0	5	1	0	0	0	4	0
177	1	Fouskari	FouSu17	2015-08-24	FouSu17	0	0	0	1	30	0	0	0	0	0	0	0	0	0	0	0	0	0	0	6	0	0	0	0	0	0	0	0	0	0	3	0	2	0	0	0	0	3	0	0	0	0	5	0
178	1	Fouskari	FouSu18	2015-08-24	FouSu18	0	0	0	6	68	0	2	0	0	10	0	0	0	0	0	0	0	0	0	8	0	0	0	0	0	0	0	0	0	7	3	0	11	0	0	0	0	13	0	0	0	0	83	0
179	1	Fouskari	FouSu19	2015-08-24	FouSu19	0	0	0	1	6	0	0	0	0	0	0	0	0	0	0	0	0	0	0	4	0	0	0	0	0	0	0	0	0	0	0	0	2	0	0	0	0	6	0	0	0	0	8	0
180	1	Fouskari	FouSu20	2015-08-24	FouSu20	0	0	0	3	27	0	0	0	0	1	0	0	0	0	0	0	0	0	0	2	1	0	0	0	0	0	0	0	0	0	0	0	3	0	0	0	0	2	0	0	0	0	43	0
181	2	Krathis_Up	KrSu1	2015-08-25	KrSu1	0	0	0	0	107	0	0	0	0	2	0	0	0	0	0	0	0	0	0	1	1	0	0	0	0	8	0	0	0	0	1	0	1	0	0	0	0	0	0	0	0	0	0	0
182	2	Krathis_Up	KrSu2	2015-08-25	KrSu2	0	0	0	0	76	0	0	0	0	4	0	0	0	0	0	0	0	0	0	0	1	0	0	0	0	0	0	0	0	0	0	0	0	0	0	0	0	0	0	0	0	0	0	0
183	2	Krathis_Up	KrSu3	2015-08-25	KrSu3	0	0	0	0	7	0	0	0	0	0	0	0	0	0	0	0	0	0	1	0	1	0	0	0	0	0	0	0	0	0	0	0	0	0	0	0	0	0	0	0	0	0	0	0
184	2	Krathis_Up	KrSu4	2015-08-25	KrSu4	0	0	0	0	13	0	0	0	1	2	0	0	0	0	0	0	0	0	0	0	0	0	0	0	0	1	0	0	0	0	0	0	1	0	0	0	0	0	0	0	0	0	0	0
185	2	Krathis_Up	KrSu5	2015-08-25	KrSu5	0	0	0	0	8	0	0	0	0	0	0	0	0	0	0	0	0	0	0	0	0	0	3	0	0	19	0	0	0	0	0	2	1	0	0	0	0	0	0	0	0	0	0	0
186	2	Krathis_Up	KrSu6	2015-08-25	KrSu6	0	0	0	0	154	0	0	0	0	4	0	0	0	0	0	0	0	0	0	5	1	0	0	0	0	1	0	0	0	0	0	1	1	0	0	0	0	0	0	0	0	0	1	0
187	2	Krathis_Up	KrSu7	2015-08-25	KrSu7	0	0	0	0	302	0	0	0	0	8	0	0	0	0	0	0	0	0	0	0	1	0	0	0	0	2	0	0	0	0	0	0	1	0	0	0	0	0	0	0	0	0	0	0
188	2	Krathis_Up	KrSu8	2015-08-25	KrSu8	0	0	0	0	134	0	0	0	1	7	0	0	0	0	0	0	0	0	0	0	0	0	0	0	0	1	0	0	0	0	0	0	0	0	0	0	0	0	0	0	0	0	0	0
189	2	Krathis_Up	KrSu9	2015-08-25	KrSu9	0	0	0	0	23	0	0	0	0	4	0	0	1	0	0	0	0	0	0	0	8	0	1	0	0	6	0	0	0	0	0	0	0	0	0	0	0	0	0	0	0	0	0	0
190	2	Krathis_Up	KrSu10	2015-08-25	KrSu10	0	0	0	0	172	0	0	0	1	16	0	0	0	0	0	0	0	2	0	1	0	0	0	0	0	2	0	0	0	0	3	1	0	0	0	0	0	0	0	0	0	0	2	0
191	2	Krathis_Up	KrSu11	2015-08-25	KrSu11	0	0	0	0	137	0	0	0	0	3	0	0	0	0	0	0	0	0	0	0	0	0	0	0	0	0	0	0	0	0	1	0	0	0	0	0	1	0	0	0	0	0	1	0
192	2	Krathis_Up	KrSu12	2015-08-25	KrSu12	0	0	0	0	113	0	0	0	0	14	0	0	0	0	0	0	0	0	0	1	0	1	0	0	0	0	0	0	0	0	1	0	1	0	0	0	0	0	0	0	0	0	0	0
193	2	Krathis_Up	KrSu13	2015-08-25	KrSu13	0	0	0	1	129	0	0	0	0	0	0	0	0	0	0	0	0	0	0	0	0	0	0	0	0	17	0	0	0	0	1	0	1	0	0	0	0	0	0	0	0	0	0	0
194	2	Krathis_Up	KrSu14	2015-08-25	KrSu14	0	0	0	0	131	0	0	0	0	0	0	0	0	0	0	0	0	0	0	0	0	0	0	0	0	0	0	0	0	0	1	0	0	0	0	0	0	0	0	0	0	0	0	0
195	2	Krathis_Up	KrSu15	2015-08-25	KrSu15	0	0	0	0	35	0	0	0	0	1	0	0	0	0	0	0	0	1	0	0	0	0	0	0	0	0	0	0	0	0	5	0	2	0	0	0	0	0	0	0	0	0	0	0
196	2	Krathis_Up	KrSu16	2015-08-25	KrSu16	0	0	0	0	66	0	0	0	1	18	0	0	0	0	0	0	0	0	0	3	5	0	0	0	0	0	0	0	0	0	2	1	0	0	0	0	0	0	0	0	0	0	0	0
197	2	Krathis_Up	KrSu17	2015-08-25	KrSu17	0	0	0	0	105	0	0	0	0	3	0	0	0	0	0	0	0	0	0	2	1	0	0	0	0	0	0	0	0	0	0	0	0	0	0	0	0	0	0	0	0	0	0	0
198	2	Krathis_Up	KrSu18	2015-08-25	KrSu18	0	0	0	0	45	0	0	0	0	8	0	0	0	0	2	0	0	3	0	4	0	0	0	0	0	1	0	0	0	0	1	0	4	0	0	0	0	0	0	0	0	0	3	0
199	2	Krathis_Up	KrSu19	2015-08-25	KrSu19	0	0	0	0	57	0	2	0	0	8	0	0	0	0	0	0	0	2	0	3	1	0	0	0	0	15	0	0	0	0	2	1	1	0	0	0	0	0	0	0	0	0	2	0
200	2	Krathis_Up	KrSu20	2015-08-25	KrSu20	0	0	0	0	169	0	0	0	0	0	0	0	0	0	0	0	0	0	0	2	0	0	0	0	0	1	0	0	0	0	1	0	0	0	0	0	0	0	0	0	0	0	0	0
201	3	Ag. Dimitrios	AgDSu1	2015-08-25	AgDSu1	0	0	0	0	6	0	13	0	1	66	0	0	0	0	0	0	0	0	0	4	4	0	0	0	0	0	0	0	0	0	3	2	4	0	0	0	0	50	0	0	0	0	32	0
202	3	Ag. Dimitrios	AgDSu2	2015-08-25	AgDSu2	0	0	0	0	2	0	42	0	0	10	0	0	0	0	0	0	0	0	0	0	0	0	0	0	0	0	0	1	0	0	1	7	0	0	0	0	0	0	0	0	0	0	44	0
203	3	Ag. Dimitrios	AgDSu3	2015-08-25	AgDSu3	1	0	0	0	8	0	18	0	0	6	0	0	0	0	0	0	0	0	0	4	4	0	2	0	0	0	0	1	0	0	1	3	1	0	0	0	0	16	0	0	0	0	48	0
204	3	Ag. Dimitrios	AgDSu4	2015-08-25	AgDSu4	0	0	0	0	4	0	178	0	0	39	0	0	0	0	0	0	0	0	0	5	15	0	5	0	0	0	0	7	0	0	3	5	2	0	0	0	0	38	7	0	0	0	158	0
205	3	Ag. Dimitrios	AgDSu5	2015-08-25	AgDSu5	0	0	0	3	4	0	53	0	0	14	0	0	0	0	0	0	0	0	0	6	4	0	2	0	0	0	0	8	0	0	0	12	0	0	0	0	0	7	1	0	0	0	88	0
206	3	Ag. Dimitrios	AgDSu6	2015-08-25	AgDSu6	2	0	0	0	12	0	44	0	0	5	0	0	0	0	0	0	0	0	0	10	6	0	0	0	0	0	0	1	0	0	3	3	3	0	0	0	0	13	0	0	0	0	42	0
207	3	Ag. Dimitrios	AgDSu7	2015-08-25	AgDSu7	0	0	0	0	1	0	22	0	0	1	0	0	0	0	0	0	0	0	0	2	1	0	0	0	0	0	0	1	0	0	0	2	2	0	0	0	0	1	1	0	0	0	36	0
208	3	Ag. Dimitrios	AgDSu8	2015-08-25	AgDSu8	0	0	0	0	0	0	43	0	0	19	0	0	0	0	0	0	0	0	0	8	8	0	3	0	0	0	0	11	0	0	0	5	3	0	0	0	0	0	1	0	0	0	84	0
209	3	Ag. Dimitrios	AgDSu9	2015-08-25	AgDSu9	0	0	0	0	0	0	5	0	0	7	0	0	0	0	0	0	0	0	0	0	1	0	1	0	0	0	0	0	0	0	0	9	0	0	0	0	0	2	1	0	0	0	8	0
210	3	Ag. Dimitrios	AgDSu10	2015-08-25	AgDSu10	0	0	0	2	0	0	64	0	1	40	0	0	5	0	0	0	0	0	0	15	3	0	8	0	0	0	0	9	0	0	0	5	0	0	0	0	0	0	2	0	0	0	49	0
211	3	Ag. Dimitrios	AgDSu11	2015-08-25	AgDSu11	0	0	0	1	3	0	36	0	0	2	0	0	0	0	0	0	0	0	0	4	3	0	0	0	0	0	0	1	0	0	1	3	0	0	0	0	0	0	2	0	0	0	49	0
212	3	Ag. Dimitrios	AgDSu12	2015-08-25	AgDSu12	0	0	0	1	1	0	52	0	0	0	0	0	0	0	0	0	0	0	0	2	3	0	2	0	0	0	0	6	0	0	0	18	3	0	0	0	0	2	3	0	0	0	64	0
213	3	Ag. Dimitrios	AgDSu13	2015-08-25	AgDSu13	0	0	0	1	0	0	10	0	0	3	0	0	0	0	0	0	0	0	0	0	2	0	0	0	0	0	0	1	0	0	0	11	3	0	0	0	0	2	1	0	0	0	24	0
214	3	Ag. Dimitrios	AgDSu14	2015-08-25	AgDSu14	0	0	0	0	8	0	36	0	0	7	0	0	0	0	0	0	0	0	0	1	2	0	0	0	0	0	0	1	0	0	3	0	27	0	0	0	0	19	0	0	0	0	50	0
215	3	Ag. Dimitrios	AgDSu15	2015-08-25	AgDSu15	1	1	0	0	3	0	57	0	0	18	0	0	0	0	0	0	0	0	0	2	1	0	1	0	1	0	0	0	0	0	0	3	9	1	0	0	0	11	0	0	0	0	85	0
216	3	Ag. Dimitrios	AgDSu16	2015-08-25	AgDSu16	0	0	0	0	17	0	10	0	0	21	0	0	0	0	0	0	0	0	0	2	1	0	0	0	0	0	0	1	0	0	0	1	6	0	0	0	0	28	0	0	0	0	30	0
217	3	Ag. Dimitrios	AgDSu17	2015-08-25	AgDSu17	0	0	0	0	9	0	55	0	0	9	0	0	0	0	0	0	0	0	0	3	1	0	0	0	0	0	0	1	0	0	0	3	15	0	0	0	0	19	0	0	0	0	86	0
218	3	Ag. Dimitrios	AgDSu18	2015-08-25	AgDSu18	0	0	0	1	0	0	3	0	0	2	0	0	0	0	0	0	0	0	0	0	0	0	0	0	0	0	0	0	0	0	1	0	5	0	0	0	0	1	1	0	0	0	25	0
219	3	Ag. Dimitrios	AgDSu19	2015-08-25	AgDSu19	0	0	0	0	7	0	27	0	0	2	0	0	0	0	0	0	0	0	0	3	2	0	0	0	0	0	0	2	0	0	0	0	4	1	0	0	0	17	0	0	0	0	34	0
220	3	Ag. Dimitrios	AgDSu20	2015-08-25	AgDSu20	0	0	0	1	0	0	22	0	0	1	0	0	0	0	0	0	0	0	0	0	1	0	1	0	1	0	0	1	0	0	1	2	0	0	0	0	0	0	2	0	0	0	19	0
221	4	Parapeiros_W	ParWSu1	2015-08-26	ParWSu1	0	0	0	1	2	0	3	0	0	16	0	0	0	0	0	0	0	0	0	0	0	0	0	0	0	0	0	19	0	0	0	1	0	0	0	0	0	1	0	0	0	2	5	0
222	4	Parapeiros_W	ParWSu2	2015-08-26	ParWSu2	0	0	0	0	0	0	0	0	0	5	0	0	0	0	0	0	1	0	0	0	0	0	0	0	0	0	0	2	0	0	0	0	0	0	0	0	0	0	0	0	0	0	0	0
223	4	Parapeiros_W	ParWSu3	2015-08-26	ParWSu3	0	0	0	0	0	0	0	0	0	25	0	0	0	0	0	0	1	0	0	1	0	0	0	0	0	0	0	24	0	0	0	1	1	0	0	0	0	2	5	0	0	1	1	0
224	4	Parapeiros_W	ParWSu4	2015-08-26	ParWSu4	0	0	0	1	0	0	0	0	0	10	0	0	0	0	0	0	0	0	0	0	0	0	0	0	0	0	0	16	0	0	0	0	0	0	0	0	0	1	3	0	0	0	0	0
225	4	Parapeiros_W	ParWSu5	2015-08-26	ParWSu5	0	0	0	1	0	0	0	0	1	10	0	0	0	0	0	0	0	0	0	1	0	0	0	0	0	0	0	20	0	0	0	1	1	0	0	0	0	1	2	0	0	0	0	0
226	4	Parapeiros_W	ParWSu6	2015-08-26	ParWSu6	0	0	0	0	0	0	1	0	0	15	0	0	0	0	0	0	0	0	0	1	0	0	0	0	0	0	0	22	0	0	0	1	0	0	0	0	0	1	2	0	0	0	1	0
227	4	Parapeiros_W	ParWSu7	2015-08-26	ParWSu7	0	0	0	0	0	0	3	0	0	8	0	0	0	0	0	0	0	1	0	0	0	0	0	0	0	0	0	27	0	0	0	0	19	0	0	0	0	7	9	0	0	0	5	0
228	4	Parapeiros_W	ParWSu8	2015-08-26	ParWSu8	0	0	0	0	0	0	0	0	0	8	0	0	0	0	0	0	0	0	0	1	0	0	0	0	0	0	0	25	0	0	0	1	3	0	0	0	0	4	4	0	0	0	6	0
229	4	Parapeiros_W	ParWSu9	2015-08-26	ParWSu9	0	0	0	0	1	0	9	0	0	3	0	0	0	0	0	0	0	0	0	8	0	0	0	0	1	0	0	26	0	0	0	0	16	0	0	0	0	1	3	0	0	0	9	0
230	4	Parapeiros_W	ParWSu10	2015-08-26	ParWSu10	0	0	0	0	1	0	3	0	0	1	0	0	0	0	0	0	0	0	0	0	0	0	0	0	1	0	0	7	0	0	0	0	1	0	0	0	0	0	0	0	0	0	4	0
231	4	Parapeiros_W	ParWSu11	2015-08-26	ParWSu11	0	0	0	0	0	0	4	0	0	10	0	0	1	0	0	0	0	0	0	0	0	0	0	0	0	0	0	27	0	0	0	1	0	0	0	0	0	0	5	0	0	0	1	0
232	4	Parapeiros_W	ParWSu12	2015-08-26	ParWSu12	0	0	0	0	0	0	2	0	0	11	0	0	0	0	0	0	1	0	0	1	0	0	0	0	0	0	0	19	0	0	0	0	0	0	0	0	0	0	2	0	0	1	0	0
233	4	Parapeiros_W	ParWSu13	2015-08-26	ParWSu13	0	0	0	0	0	0	3	0	1	6	0	0	0	0	0	0	0	0	0	0	0	0	0	0	0	0	0	0	0	0	0	0	0	0	0	0	0	0	1	0	0	1	0	0
234	4	Parapeiros_W	ParWSu14	2015-08-26	ParWSu14	0	0	0	0	0	0	1	0	0	5	0	0	0	0	0	0	0	0	0	0	0	0	0	0	0	0	0	6	0	0	0	0	0	0	0	0	0	0	3	0	0	0	0	0
235	4	Parapeiros_W	ParWSu15	2015-08-26	ParWSu15	0	0	0	1	0	0	3	0	0	6	0	0	0	0	0	0	0	0	0	0	0	0	0	0	0	0	0	16	0	0	0	1	0	0	0	0	0	0	2	0	1	2	0	0
236	4	Parapeiros_W	ParWSu16	2015-08-26	ParWSu16	0	0	0	0	1	0	4	0	1	8	0	0	0	0	0	0	0	1	0	1	0	0	0	0	0	0	0	15	0	0	0	0	1	0	0	0	0	0	2	0	0	1	3	0
237	4	Parapeiros_W	ParWSu17	2015-08-26	ParWSu17	0	0	0	1	0	0	1	0	0	5	0	0	0	0	0	0	0	0	0	1	0	0	0	0	0	0	0	14	0	0	0	0	2	0	0	0	0	0	3	0	0	0	2	0
238	4	Parapeiros_W	ParWSu18	2015-08-26	ParWSu18	0	0	0	0	1	0	1	0	2	22	0	0	0	0	0	0	0	0	0	8	0	0	0	0	1	0	0	46	0	0	0	1	5	0	0	0	1	0	17	0	0	1	3	0
239	4	Parapeiros_W	ParWSu19	2015-08-26	ParWSu19	0	0	0	0	2	0	3	0	0	6	0	0	0	0	0	0	0	0	0	0	0	0	0	0	2	0	0	10	0	0	0	0	16	0	0	0	0	2	11	0	0	0	9	0
240	4	Parapeiros_W	ParWSu20	2015-08-26	ParWSu20	0	0	0	0	1	0	3	0	1	19	0	0	0	0	0	0	0	0	0	7	1	0	0	0	1	0	0	58	0	0	0	1	1	0	0	0	0	0	12	0	0	1	7	0
241	5	Evinos_Up	EviSu1	2015-08-27	EviSu1	0	0	0	0	8	0	0	0	0	0	0	0	0	0	0	0	0	0	0	0	1	1	0	0	0	0	0	0	0	0	0	1	0	0	0	0	0	0	0	0	0	0	17	0
242	5	Evinos_Up	EviSu2	2015-08-27	EviSu2	0	0	0	1	11	0	0	0	0	0	0	0	0	0	0	0	0	0	0	2	2	1	0	0	0	0	0	0	0	0	0	0	0	0	0	0	0	4	0	0	0	0	4	0
243	5	Evinos_Up	EviSu3	2015-08-27	EviSu3	0	0	0	0	0	0	0	0	0	0	0	0	0	0	0	0	0	0	0	0	0	4	0	0	0	0	0	0	0	0	0	1	0	0	0	0	0	1	0	0	0	0	2	0
244	5	Evinos_Up	EviSu4	2015-08-27	EviSu4	0	0	0	0	2	0	0	0	0	0	0	0	0	0	0	0	0	0	0	0	2	4	0	0	0	0	0	0	0	0	0	0	1	0	0	0	0	1	0	0	0	0	11	0
245	5	Evinos_Up	EviSu5	2015-08-27	EviSu5	0	0	0	2	12	0	0	0	0	0	0	0	0	0	0	0	0	1	0	6	0	0	0	0	0	0	0	0	0	0	2	1	2	0	0	0	0	10	1	0	0	0	14	0
246	5	Evinos_Up	EviSu6	2015-08-27	EviSu6	0	0	0	0	10	0	0	0	0	0	0	0	0	0	0	0	0	0	0	0	3	1	0	0	0	0	0	0	0	0	0	1	0	0	0	0	0	0	1	0	0	0	11	0
247	5	Evinos_Up	EviSu7	2015-08-27	EviSu7	0	0	0	1	2	0	0	0	0	0	0	0	0	0	0	0	0	0	0	0	0	1	0	0	0	0	0	0	0	0	0	0	0	0	0	0	0	0	0	0	0	0	6	0
248	5	Evinos_Up	EviSu8	2015-08-27	EviSu8	0	0	0	3	13	0	1	0	0	0	0	0	0	0	0	0	0	0	0	0	2	0	0	0	0	0	0	0	0	0	0	0	0	0	0	0	0	4	0	0	0	0	15	0
249	5	Evinos_Up	EviSu9	2015-08-27	EviSu9	0	0	0	2	14	0	0	0	0	0	0	0	0	0	0	0	0	0	0	2	0	1	0	0	0	0	0	0	0	0	1	0	0	0	0	0	0	0	0	0	0	0	44	0
250	5	Evinos_Up	EviSu10	2015-08-27	EviSu10	0	0	0	3	10	0	0	0	0	0	0	0	0	0	0	0	0	0	0	1	0	0	0	0	0	0	0	0	0	0	2	0	1	0	0	0	0	0	0	0	0	0	3	0
251	5	Evinos_Up	EviSu11	2015-08-27	EviSu11	0	0	0	1	10	0	0	0	0	0	0	0	0	0	0	0	0	0	0	1	0	0	0	0	0	0	0	0	0	0	0	0	12	0	0	0	0	1	0	0	0	0	50	0
252	5	Evinos_Up	EviSu12	2015-08-27	EviSu12	0	0	0	0	8	0	0	0	0	0	0	0	0	0	0	0	0	0	0	1	0	0	0	0	0	0	0	0	0	0	0	0	4	0	0	0	0	1	0	0	0	0	5	0
253	5	Evinos_Up	EviSu13	2015-08-27	EviSu13	0	0	0	0	2	0	0	0	0	0	0	0	0	0	0	0	0	0	0	5	0	0	0	0	0	1	0	0	0	0	6	0	7	0	0	0	0	3	0	0	0	0	26	0
254	5	Evinos_Up	EviSu14	2015-08-27	EviSu14	0	0	0	3	12	0	0	0	0	0	0	0	0	0	0	0	0	0	0	5	0	0	0	0	0	0	0	0	0	0	1	0	29	0	0	0	0	6	0	0	0	0	9	0
255	5	Evinos_Up	EviSu15	2015-08-27	EviSu15	0	0	0	4	19	0	0	0	0	0	0	0	0	0	0	0	0	0	0	0	0	0	0	0	0	0	0	0	0	0	4	0	8	0	0	0	0	4	0	0	0	0	17	0
256	5	Evinos_Up	EviSu16	2015-08-27	EviSu16	0	0	0	1	7	0	1	0	0	0	0	0	0	0	0	0	0	0	0	1	0	0	0	0	0	0	0	0	0	0	2	0	0	0	0	0	0	6	0	0	0	0	18	0
257	5	Evinos_Up	EviSu17	2015-08-27	EviSu17	0	0	0	2	21	0	1	0	0	0	0	0	0	0	0	0	0	0	0	0	0	0	0	0	0	0	0	0	0	0	7	0	11	0	0	0	0	0	8	0	0	0	27	0
258	5	Evinos_Up	EviSu18	2015-08-27	EviSu18	0	0	0	1	10	0	0	0	0	0	0	0	0	0	0	0	0	0	0	1	0	0	0	0	0	0	0	0	0	0	0	0	9	0	0	0	0	6	2	0	0	0	4	0
259	5	Evinos_Up	EviSu19	2015-08-27	EviSu19	0	0	0	1	8	0	0	0	0	0	0	0	0	0	0	0	0	0	0	0	2	0	0	0	0	0	0	0	0	0	1	0	24	0	0	0	0	2	0	0	0	1	11	0
260	5	Evinos_Up	EviSu20	2015-08-27	EviSu20	0	0	0	3	14	0	0	0	0	0	0	0	0	0	0	0	0	0	0	2	1	0	0	0	0	0	0	0	0	0	2	0	6	0	0	0	0	13	0	0	0	0	17	0
261	6	Mornos_Up	MorSu1	2015-08-26	MorSu1	0	0	0	0	44	0	18	0	0	3	0	0	0	0	0	0	0	1	0	10	4	0	0	0	0	0	0	1	1	0	6	0	1	0	0	0	0	38	0	0	0	0	22	0
262	6	Mornos_Up	MorSu2	2015-08-26	MorSu2	0	0	0	0	33	0	17	0	0	1	0	0	0	0	0	0	0	0	0	3	0	0	0	0	0	0	0	1	0	0	8	0	1	0	0	0	0	34	0	0	0	0	26	0
263	6	Mornos_Up	MorSu3	2015-08-26	MorSu3	0	0	0	0	25	0	6	0	0	4	0	0	0	0	0	0	0	2	0	8	2	0	0	0	0	0	0	0	0	0	3	0	0	0	0	0	0	8	0	0	0	0	22	0
264	6	Mornos_Up	MorSu4	2015-08-26	MorSu4	0	0	0	0	6	0	8	0	0	9	0	0	0	0	0	0	0	0	0	7	1	0	0	0	0	0	0	0	0	0	6	1	0	0	0	0	0	8	0	0	0	0	3	0
265	6	Mornos_Up	MorSu5	2015-08-26	MorSu5	0	0	0	0	4	0	2	0	0	3	0	0	0	0	0	0	0	0	0	1	1	0	0	0	0	0	0	0	0	0	0	0	0	0	0	0	0	1	0	0	0	0	2	0
266	6	Mornos_Up	MorSu6	2015-08-26	MorSu6	0	0	0	0	11	0	4	0	0	3	0	0	0	0	0	0	0	0	0	0	0	0	0	0	0	0	0	0	0	0	5	0	0	0	0	0	0	7	0	0	0	0	1	0
267	6	Mornos_Up	MorSu7	2015-08-26	MorSu7	0	0	0	0	6	0	10	0	0	0	0	0	0	0	0	0	0	1	0	2	6	0	0	0	0	0	0	0	0	0	4	2	0	0	0	0	0	3	0	0	0	0	20	0
268	6	Mornos_Up	MorSu8	2015-08-26	MorSu8	0	0	0	0	12	0	14	0	0	1	0	0	0	0	0	0	0	0	0	0	0	0	0	0	0	0	0	0	0	0	3	0	0	0	0	0	0	7	0	0	0	0	11	0
269	6	Mornos_Up	MorSu9	2015-08-26	MorSu9	0	0	0	0	2	0	2	0	0	2	0	0	0	0	0	0	0	0	0	0	1	0	0	0	0	0	0	0	0	0	0	0	0	0	0	0	0	0	0	0	0	0	3	0
270	6	Mornos_Up	MorSu10	2015-08-26	MorSu10	0	0	0	0	1	0	1	0	0	21	0	0	0	0	0	0	0	0	0	1	1	0	0	0	0	0	0	1	0	0	0	0	0	0	0	0	0	0	0	0	0	0	1	0
271	6	Mornos_Up	MorSu11	2015-08-26	MorSu11	0	0	0	0	4	0	6	0	0	5	0	0	0	0	0	0	0	0	0	4	4	0	0	0	0	0	0	1	0	0	2	2	0	0	0	0	0	0	0	0	0	0	1	0
272	6	Mornos_Up	MorSu12	2015-08-26	MorSu12	0	0	0	0	6	0	1	0	0	3	0	0	0	0	0	0	0	0	0	0	0	4	0	0	0	0	0	0	0	0	0	1	0	0	0	0	0	0	0	0	0	0	4	0
273	6	Mornos_Up	MorSu13	2015-08-26	MorSu13	0	0	0	0	19	0	5	0	0	2	0	0	0	0	0	0	0	0	0	0	2	2	0	0	0	0	0	0	0	0	1	2	0	0	0	0	0	4	0	0	0	0	3	0
274	6	Mornos_Up	MorSu14	2015-08-26	MorSu14	0	0	0	0	3	0	3	0	0	0	0	0	0	0	0	0	0	0	0	4	1	1	0	0	0	0	0	0	0	0	1	1	0	0	0	0	0	0	0	0	0	0	4	0
275	6	Mornos_Up	MorSu15	2015-08-26	MorSu15	0	0	0	0	3	0	0	0	0	1	0	0	0	0	0	0	0	0	0	0	0	1	0	0	0	0	0	0	0	1	0	0	0	0	0	0	0	0	1	0	0	0	1	0
276	6	Mornos_Up	MorSu16	2015-08-26	MorSu16	0	0	0	0	1	0	4	0	0	0	0	0	0	0	0	0	0	0	1	0	0	1	0	0	0	0	0	0	0	0	0	0	0	0	0	0	0	1	0	0	0	0	1	0
277	6	Mornos_Up	MorSu17	2015-08-26	MorSu17	0	0	0	0	14	0	13	0	0	6	0	0	0	0	0	0	0	0	0	4	6	5	0	0	0	0	0	0	0	0	3	2	1	0	0	0	0	0	0	0	0	0	6	0
278	6	Mornos_Up	MorSu18	2015-08-26	MorSu18	0	0	0	0	19	0	1	0	0	4	0	0	0	0	0	0	0	0	0	5	0	1	0	0	0	0	0	0	1	0	0	0	0	0	0	0	0	5	0	0	0	0	2	0
279	6	Mornos_Up	MorSu19	2015-08-26	MorSu19	0	0	0	0	53	0	5	0	0	3	0	0	0	0	0	0	0	1	0	3	0	0	0	0	0	0	0	0	0	0	4	0	1	0	0	0	0	9	0	0	0	0	11	0
280	6	Mornos_Up	MorSu20	2015-08-26	MorSu20	0	0	0	0	7	0	10	0	0	1	0	0	0	0	0	0	0	0	0	1	0	0	0	0	0	0	0	0	0	0	3	0	0	0	0	0	0	0	0	0	0	0	5	0
281	7	Per06.1	Per06Su1	2015-08-28	Per06Su1	0	0	0	0	32	0	0	0	0	3	0	0	0	0	0	0	0	0	0	2	0	1	0	0	0	0	0	0	0	0	48	1	3	0	0	0	0	9	0	1	0	0	0	0
282	7	Per06.1	Per06Su2	2015-08-28	Per06Su2	0	0	0	2	21	0	0	0	0	7	0	0	0	0	0	0	0	0	0	4	0	0	0	0	0	0	0	0	0	0	33	1	17	0	0	0	0	0	0	0	0	0	0	7
283	7	Per06.1	Per06Su3	2015-08-28	Per06Su3	0	0	0	0	17	0	0	0	0	4	0	0	0	0	0	0	0	0	0	4	0	0	0	0	0	0	0	0	0	0	26	4	3	0	0	0	0	1	0	0	0	0	1	0
284	7	Per06.1	Per06Su4	2015-08-28	Per06Su4	0	0	0	33	18	0	0	0	0	3	0	0	0	0	0	0	0	1	0	5	1	3	2	0	0	10	0	0	0	0	23	0	11	0	0	0	0	1	0	0	0	0	3	1
285	7	Per06.1	Per06Su5	2015-08-28	Per06Su5	0	0	0	3	11	0	4	0	0	0	0	0	0	0	0	0	0	0	0	0	0	0	0	0	0	2	0	0	0	0	12	0	0	0	0	0	0	1	0	0	0	0	8	0
286	7	Per06.1	Per06Su6	2015-08-28	Per06Su6	0	0	0	2	6	0	5	0	0	1	0	0	0	0	0	0	0	0	1	1	1	0	1	0	0	0	0	0	0	0	3	0	1	0	0	0	0	1	0	0	0	0	5	0
287	7	Per06.1	Per06Su7	2015-08-28	Per06Su7	0	0	0	4	14	0	6	0	0	1	0	0	0	0	0	0	0	0	1	0	1	0	0	0	0	0	0	0	0	0	16	0	0	0	0	0	0	0	0	0	0	0	16	0
288	7	Per06.1	Per06Su8	2015-08-28	Per06Su8	0	0	0	3	2	0	3	0	1	35	0	0	0	0	0	0	0	0	3	1	2	1	0	0	0	0	0	0	0	0	1	0	0	0	0	0	0	0	1	0	0	0	4	0
289	7	Per06.1	Per06Su9	2015-08-28	Per06Su9	0	0	0	8	20	0	0	0	1	52	0	0	0	0	0	0	0	1	8	1	1	0	0	0	0	0	0	0	0	0	28	0	4	0	0	0	0	0	0	0	0	1	1	0
290	7	Per06.1	Per06Su10	2015-08-28	Per06Su10	0	0	0	3	2	0	8	0	0	9	0	0	0	0	0	0	0	0	0	2	0	1	0	0	0	0	0	0	0	0	0	0	0	0	0	0	0	0	0	0	0	0	0	0
291	7	Per06.1	Per06Su11	2015-08-28	Per06Su11	0	0	0	12	2	0	2	0	0	68	0	0	0	0	0	0	0	2	2	1	1	0	0	0	0	0	0	0	0	0	11	2	1	0	0	0	0	0	0	0	0	0	1	1
292	7	Per06.1	Per06Su12	2015-08-28	Per06Su12	0	0	0	0	61	0	0	0	0	5	0	0	0	0	0	0	0	4	0	7	0	0	0	0	0	0	0	0	0	0	16	0	21	0	0	0	0	5	0	0	0	0	1	0
293	7	Per06.1	Per06Su13	2015-08-28	Per06Su13	0	0	0	1	72	0	0	0	0	32	0	0	0	0	0	0	0	1	0	10	0	1	0	0	0	0	0	0	0	0	92	0	70	0	0	0	0	21	0	0	0	0	0	1
294	7	Per06.1	Per06Su14	2015-08-28	Per06Su14	0	0	0	1	74	0	2	0	0	93	0	0	0	0	0	0	0	2	0	8	1	1	0	0	0	0	0	0	0	0	17	3	32	0	0	0	0	7	1	1	0	0	0	2
295	7	Per06.1	Per06Su15	2015-08-28	Per06Su15	0	0	0	1	16	0	2	0	0	118	0	0	0	0	0	0	0	0	1	2	0	0	0	0	0	0	0	0	0	0	0	1	1	0	0	0	0	2	2	0	0	1	0	0
296	7	Per06.1	Per06Su16	2015-08-28	Per06Su16	0	0	0	0	8	0	0	0	1	17	0	0	0	0	0	0	0	1	0	6	0	0	0	0	0	0	0	0	0	0	12	1	34	0	0	0	0	6	0	0	0	0	0	0
297	7	Per06.1	Per06Su17	2015-08-28	Per06Su17	0	0	0	2	54	0	0	0	0	20	0	0	0	0	0	0	0	0	0	20	0	2	0	0	0	0	0	0	0	0	27	0	35	0	0	0	0	8	1	1	0	0	0	2
298	7	Per06.1	Per06Su18	2015-08-28	Per06Su18	0	0	0	4	10	0	3	0	0	109	0	0	0	0	0	0	0	0	4	2	0	0	0	0	0	0	0	0	0	0	9	0	2	0	0	0	0	0	2	0	0	0	1	0
299	7	Per06.1	Per06Su19	2015-08-28	Per06Su19	0	0	0	0	20	0	0	0	0	11	0	0	0	0	0	1	0	1	0	9	0	0	0	0	0	0	0	0	0	0	28	0	18	0	0	0	0	3	0	2	0	0	0	0
300	7	Per06.1	Per06Su20	2015-08-28	Per06Su20	0	0	0	2	47	0	0	0	0	39	0	0	0	0	0	0	0	1	0	5	1	0	0	0	0	0	0	0	0	0	15	1	27	0	0	0	0	3	0	1	0	0	0	0
301	8	SidePer10	SidePSu1	2015-08-28	SidePSu1	0	0	0	0	3	0	2	0	0	65	0	0	0	0	0	0	0	0	0	0	1	0	0	0	0	0	0	0	0	0	1	0	0	0	0	0	0	3	0	10	0	0	0	0
302	8	SidePer10	SidePSu2	2015-08-28	SidePSu2	0	0	0	0	6	0	18	0	0	54	0	0	0	0	0	0	0	1	1	0	1	0	0	0	0	0	0	0	0	0	1	6	0	0	0	0	0	3	0	5	0	0	1	0
303	8	SidePer10	SidePSu3	2015-08-28	SidePSu3	0	0	0	0	1	0	7	0	0	36	0	0	0	0	0	0	0	1	0	0	1	1	0	0	0	1	0	0	0	0	0	3	0	0	0	0	0	0	1	9	0	0	0	0
304	8	SidePer10	SidePSu4	2015-08-28	SidePSu4	0	0	0	0	0	0	1	0	0	62	0	0	0	0	0	0	0	1	0	1	0	0	0	0	0	0	0	0	0	0	0	2	0	0	0	0	0	0	0	6	0	0	1	0
305	8	SidePer10	SidePSu5	2015-08-28	SidePSu5	0	0	0	0	0	0	8	0	0	228	0	0	0	0	0	0	0	0	0	0	3	0	2	0	0	0	0	0	0	0	0	4	0	0	0	0	0	0	0	0	0	0	4	0
306	8	SidePer10	SidePSu6	2015-08-28	SidePSu6	0	0	0	0	1	0	0	0	0	25	0	0	0	0	0	0	0	0	0	0	1	1	0	0	0	0	0	0	0	0	0	3	0	0	0	0	0	0	0	1	0	0	1	0
307	8	SidePer10	SidePSu7	2015-08-28	SidePSu7	0	0	0	0	0	0	1	0	0	7	0	0	0	0	0	0	0	0	0	0	2	0	0	0	0	0	0	0	0	0	2	0	0	0	0	0	0	0	0	2	0	0	0	0
308	8	SidePer10	SidePSu8	2015-08-28	SidePSu8	0	0	0	1	58	0	0	0	0	16	0	0	0	0	0	0	0	2	0	3	2	0	0	0	0	0	0	0	0	0	2	0	3	0	0	0	0	14	0	8	0	0	1	0
309	8	SidePer10	SidePSu9	2015-08-28	SidePSu9	0	0	0	0	47	1	0	0	0	19	0	0	0	0	0	0	0	5	0	2	1	0	0	0	0	0	0	0	0	0	0	0	8	0	0	0	0	11	0	2	0	0	2	0
310	8	SidePer10	SidePSu10	2015-08-28	SidePSu10	0	0	0	0	20	0	0	0	0	15	0	0	0	0	0	0	0	0	0	0	0	1	0	0	0	0	0	0	0	0	0	0	1	0	0	0	0	6	1	1	0	0	1	0
311	8	SidePer10	SidePSu11	2015-08-28	SidePSu11	0	0	0	0	5	0	0	0	0	13	0	0	0	0	0	0	0	0	0	0	0	0	0	0	0	0	0	0	0	0	0	0	0	0	0	0	0	0	0	2	0	0	0	0
312	8	SidePer10	SidePSu12	2015-08-28	SidePSu12	0	0	0	0	19	1	1	0	0	10	0	0	0	0	0	0	0	2	0	1	0	0	0	0	0	0	0	0	0	0	1	0	3	0	1	0	0	21	0	14	0	0	0	0
313	8	SidePer10	SidePSu13	2015-08-28	SidePSu13	0	0	0	0	17	1	0	0	0	0	0	0	0	0	0	0	0	0	0	0	0	0	0	0	0	0	0	0	0	0	3	0	1	0	0	0	0	0	0	2	0	0	0	0
314	8	SidePer10	SidePSu14	2015-08-28	SidePSu14	0	0	0	0	3	0	1	0	0	0	0	0	0	0	0	0	0	0	0	0	0	0	0	0	0	0	0	0	0	0	1	0	0	0	0	0	0	1	0	0	0	0	0	0
315	8	SidePer10	SidePSu15	2015-08-28	SidePSu15	0	0	0	0	3	0	0	0	0	1	0	0	0	0	0	0	0	0	0	0	0	0	0	0	0	0	0	0	0	0	0	0	0	0	0	0	0	0	0	0	0	0	0	0
316	8	SidePer10	SidePSu16	2015-08-28	SidePSu16	0	0	0	1	51	1	0	0	0	28	0	0	0	0	0	0	0	1	0	0	0	1	0	0	0	0	0	0	0	0	3	0	3	0	0	0	0	21	0	2	0	0	1	0
317	8	SidePer10	SidePSu17	2015-08-28	SidePSu17	0	0	0	0	2	0	1	0	0	0	0	0	0	0	0	0	0	0	0	0	0	1	0	0	0	0	0	0	0	0	0	0	2	0	0	0	0	4	0	8	0	0	1	0
318	8	SidePer10	SidePSu18	2015-08-28	SidePSu18	0	0	0	0	24	1	1	0	0	13	0	0	0	0	0	0	0	2	0	2	0	0	0	0	0	0	0	0	0	0	0	0	8	0	0	0	0	21	0	2	0	0	1	0
319	8	SidePer10	SidePSu19	2015-08-28	SidePSu19	0	0	0	1	36	0	0	0	0	39	0	0	0	0	0	0	0	2	0	0	3	0	0	0	0	0	0	0	0	0	2	0	12	0	0	0	0	30	0	5	0	1	1	0
320	8	SidePer10	SidePSu20	2015-08-28	SidePSu20	0	0	0	1	35	0	0	0	0	0	0	0	0	0	0	0	0	1	0	0	1	0	0	0	0	0	0	0	0	0	3	0	1	0	0	0	0	7	0	5	0	0	1	0
321	1	Fouskari	FouAu1	2015-10-20	FouAu1	0	0	0	1	51	0	0	0	0	3	0	0	0	0	0	0	0	2	0	12	0	1	0	0	0	0	0	0	0	0	0	0	0	0	0	0	0	4	0	0	0	0	2	0
322	1	Fouskari	FouAu2	2015-10-20	FouAu2	0	0	0	6	56	0	0	0	0	10	0	0	0	0	0	0	0	3	0	17	0	1	0	0	0	0	0	0	1	0	0	0	0	0	0	0	0	8	7	0	0	0	1	0
323	1	Fouskari	FouAu3	2015-10-20	FouAu3	0	0	0	3	51	0	0	0	0	5	0	0	0	0	0	0	0	0	0	17	1	0	0	0	0	0	0	0	0	0	0	0	0	0	0	0	0	2	3	0	0	0	1	0
324	1	Fouskari	FouAu4	2015-10-20	FouAu4	0	0	0	0	7	0	0	0	0	6	0	0	0	0	0	0	0	0	0	9	0	0	0	0	0	0	0	0	0	0	0	1	0	0	0	0	0	2	0	0	0	0	0	0
325	1	Fouskari	FouAu5	2015-10-20	FouAu5	0	0	0	4	6	0	0	0	0	5	0	0	0	0	0	0	0	0	0	7	0	0	0	0	0	0	0	0	0	0	0	1	0	0	0	0	0	0	1	0	0	0	2	0
326	1	Fouskari	FouAu6	2015-10-20	FouAu6	0	0	0	2	12	0	0	0	0	1	0	0	0	0	0	0	0	0	0	3	0	0	0	0	0	0	0	0	0	0	0	4	0	0	0	0	0	1	0	0	0	0	0	0
327	1	Fouskari	FouAu7	2015-10-20	FouAu7	0	0	0	8	33	0	1	0	0	21	0	0	0	0	0	0	0	1	0	11	0	0	1	0	0	0	0	0	0	0	0	1	0	0	0	0	0	0	1	0	0	0	9	0
328	1	Fouskari	FouAu8	2015-10-20	FouAu8	0	0	0	1	3	0	1	0	0	2	0	0	0	0	0	0	0	0	0	25	0	0	0	0	0	0	0	0	0	0	0	0	0	0	0	0	0	0	0	0	0	0	1	0
329	1	Fouskari	FouAu9	2015-10-20	FouAu9	0	0	0	7	33	0	0	0	0	0	0	0	0	0	0	0	0	0	0	10	0	0	0	0	0	0	0	0	0	0	0	0	1	0	0	0	0	6	0	0	0	0	0	0
330	1	Fouskari	FouAu10	2015-10-20	FouAu10	0	0	0	2	6	0	0	0	0	21	0	0	0	0	0	0	0	0	0	5	1	0	0	0	0	0	0	0	0	0	0	0	0	0	0	0	0	0	0	0	0	0	0	0
331	1	Fouskari	FouAu11	2015-10-20	FouAu11	0	0	0	0	38	0	0	0	0	1	0	0	0	0	0	0	0	2	0	2	0	0	0	0	0	0	0	0	0	0	3	0	3	0	0	0	0	12	0	0	0	0	3	0
332	1	Fouskari	FouAu12	2015-10-20	FouAu12	0	0	0	1	37	0	0	0	0	0	0	0	0	0	0	0	1	2	0	2	0	0	0	0	0	0	0	0	0	0	7	0	0	0	0	0	0	1	0	0	0	0	1	0
333	1	Fouskari	FouAu13	2015-10-20	FouAu13	0	0	0	2	25	0	0	0	0	0	0	0	0	0	0	0	0	1	0	3	0	0	0	0	0	0	0	0	0	0	6	0	2	0	0	0	0	7	0	0	0	0	2	0
334	1	Fouskari	FouAu14	2015-10-20	FouAu14	0	0	0	2	43	0	0	0	0	0	0	0	0	0	0	0	0	0	0	2	0	0	0	0	0	0	0	0	0	0	0	0	1	0	0	0	0	0	0	0	0	0	4	0
335	1	Fouskari	FouAu15	2015-10-20	FouAu15	0	0	0	3	25	0	0	0	0	2	0	0	0	0	0	0	0	0	0	1	0	0	0	0	0	0	0	0	0	0	12	0	0	0	0	0	0	4	1	0	0	0	0	0
336	1	Fouskari	FouAu16	2015-10-20	FouAu16	0	0	0	3	49	0	0	0	0	6	0	0	0	0	0	0	0	4	0	2	0	0	0	0	0	0	0	0	1	0	4	0	0	0	0	0	0	19	1	0	0	0	4	0
337	1	Fouskari	FouAu17	2015-10-20	FouAu17	0	0	0	2	41	0	0	0	0	2	0	0	0	0	0	0	0	0	0	9	0	0	0	0	0	0	0	0	0	0	1	0	0	0	0	0	0	2	1	0	0	0	1	0
338	1	Fouskari	FouAu18	2015-10-20	FouAu18	0	0	0	0	12	0	0	0	0	22	0	0	0	0	0	0	0	0	0	9	0	0	0	0	0	0	0	2	0	0	0	1	0	0	0	0	0	1	2	0	0	0	2	0
339	1	Fouskari	FouAu19	2015-10-20	FouAu19	0	0	0	4	12	0	0	0	0	0	0	0	0	0	0	0	0	1	0	1	0	0	0	0	0	0	0	0	0	0	1	0	0	0	0	0	0	6	0	0	0	0	2	0
340	1	Fouskari	FouAu20	2015-10-20	FouAu20	0	0	0	2	39	0	1	0	0	4	0	0	0	0	0	0	0	1	0	4	0	0	0	0	0	0	0	0	0	0	0	0	0	0	0	0	0	3	0	0	0	0	0	0
341	2	Krathis_Up	KrAu1	2015-10-21	KrAu1	0	0	0	1	4	0	0	0	0	1	0	0	0	0	0	0	0	0	0	1	0	0	0	0	0	3	0	0	0	1	0	0	0	0	0	0	0	11	1	0	0	0	0	0
342	2	Krathis_Up	KrAu2	2015-10-21	KrAu2	0	0	0	0	4	0	0	3	0	0	0	0	0	0	0	0	0	1	0	0	1	0	0	0	0	32	0	0	0	0	1	0	1	0	0	0	0	21	0	0	0	0	0	0
343	2	Krathis_Up	KrAu3	2015-10-21	KrAu3	0	0	0	1	4	0	0	1	0	0	0	0	0	0	0	0	0	0	0	0	2	0	1	0	0	30	0	0	0	0	0	0	0	0	0	0	0	2	0	0	0	0	0	0
344	2	Krathis_Up	KrAu4	2015-10-21	KrAu4	0	0	0	0	7	0	0	2	0	0	0	0	0	0	0	0	0	0	0	0	0	0	0	0	0	23	0	0	0	0	0	0	0	0	0	0	0	2	0	0	0	0	0	0
345	2	Krathis_Up	KrAu5	2015-10-21	KrAu5	0	0	0	2	4	0	0	0	0	1	0	0	0	0	0	0	0	0	0	0	0	0	0	0	0	3	0	0	0	0	3	0	1	0	0	0	0	3	0	0	0	0	0	0
346	2	Krathis_Up	KrAu6	2015-10-21	KrAu6	0	0	0	0	23	0	0	0	0	0	0	0	0	0	0	0	0	0	0	0	0	0	0	0	0	1	0	0	0	0	2	0	0	0	0	0	0	1	0	0	0	0	0	0
347	2	Krathis_Up	KrAu7	2015-10-21	KrAu7	0	0	0	0	11	0	0	0	0	0	0	0	0	0	0	0	0	0	0	0	0	0	0	0	0	0	0	0	0	0	3	0	0	0	0	0	0	2	0	0	0	0	0	0
348	2	Krathis_Up	KrAu8	2015-10-21	KrAu8	0	0	0	2	10	0	0	1	0	2	0	0	0	0	0	0	0	0	0	2	1	0	0	0	0	3	0	0	0	0	10	0	0	0	0	0	0	17	0	0	0	0	1	0
349	2	Krathis_Up	KrAu9	2015-10-21	KrAu9	0	0	0	0	27	0	0	0	0	1	0	0	0	0	0	0	0	2	0	1	1	0	0	0	0	0	0	0	0	0	6	0	0	0	0	0	0	37	0	0	0	0	0	0
350	2	Krathis_Up	KrAu10	2015-10-21	KrAu10	0	0	0	0	44	0	0	1	0	0	0	0	0	0	0	0	0	0	0	1	1	0	0	0	0	0	0	0	0	0	0	0	0	0	0	0	0	3	0	0	0	0	0	0
351	2	Krathis_Up	KrAu11	2015-10-21	KrAu11	0	0	0	0	13	0	0	0	0	1	0	0	0	0	0	0	0	0	0	0	1	0	1	0	0	1	0	0	0	0	1	0	0	0	0	0	0	3	0	0	0	0	0	0
352	2	Krathis_Up	KrAu12	2015-10-21	KrAu12	0	0	0	0	45	0	0	0	0	0	0	0	0	0	0	0	0	0	0	1	1	0	0	0	0	0	0	0	0	0	5	0	1	0	0	0	0	0	0	0	0	0	0	0
353	2	Krathis_Up	KrAu13	2015-10-21	KrAu13	0	0	0	2	1	0	0	0	0	0	0	0	0	0	0	0	0	0	0	0	0	0	0	0	0	7	0	0	0	0	2	0	1	0	0	0	0	3	0	0	0	0	0	0
354	2	Krathis_Up	KrAu14	2015-10-21	KrAu14	0	0	0	0	8	0	0	0	0	0	0	0	0	0	0	0	0	0	0	0	0	0	0	0	0	2	0	0	0	0	0	0	0	0	0	0	0	5	0	0	0	0	0	0
355	2	Krathis_Up	KrAu15	2015-10-21	KrAu15	0	0	0	1	23	0	0	0	0	2	0	0	0	0	0	0	0	0	0	0	2	0	0	0	0	1	0	0	0	0	14	0	2	0	0	0	0	12	0	0	0	0	1	0
356	2	Krathis_Up	KrAu16	2015-10-21	KrAu16	0	0	0	0	38	0	0	0	0	0	0	0	0	0	0	0	0	0	0	1	1	0	0	0	0	0	0	0	0	0	10	0	0	0	0	0	0	4	0	0	0	0	1	0
357	2	Krathis_Up	KrAu17	2015-10-21	KrAu17	0	0	0	0	57	0	0	1	0	0	0	0	0	0	0	0	0	0	0	1	0	0	0	0	0	8	0	0	0	0	10	0	5	0	0	0	0	10	0	0	0	0	3	0
358	2	Krathis_Up	KrAu18	2015-10-21	KrAu18	0	0	0	0	18	0	0	1	0	1	0	0	0	0	0	0	0	0	0	0	0	0	0	0	0	4	0	0	0	0	6	0	3	0	0	0	0	27	0	0	0	0	0	0
359	2	Krathis_Up	KrAu19	2015-10-21	KrAu19	0	0	0	1	4	0	0	1	1	1	0	0	0	0	0	0	0	0	0	1	0	0	0	0	0	16	0	0	0	0	0	0	0	0	0	0	0	1	0	0	0	0	3	0
360	2	Krathis_Up	KrAu20	2015-10-21	KrAu20	0	0	0	0	18	0	0	0	0	0	0	1	0	0	0	0	0	0	0	1	0	0	0	0	0	2	0	0	0	0	0	0	0	0	0	0	0	0	0	0	0	0	0	0
361	3	Ag. Dimitrios	AgDAu1	2015-10-21	AgDAu1	0	0	0	0	7	0	1	0	0	1	0	0	0	0	0	0	0	0	1	1	0	0	0	0	0	0	0	1	0	0	0	0	0	0	0	0	0	7	0	0	0	0	10	0
362	3	Ag. Dimitrios	AgDAu2	2015-10-21	AgDAu2	0	0	0	1	1	0	1	0	0	18	0	0	0	0	0	0	0	0	1	35	0	0	0	0	0	0	0	6	0	0	0	3	2	0	0	0	0	11	2	0	0	0	5	0
363	3	Ag. Dimitrios	AgDAu3	2015-10-21	AgDAu3	0	0	0	1	15	0	0	0	0	11	0	0	0	0	0	0	0	0	0	4	0	0	0	0	0	0	0	1	0	0	0	0	2	0	0	0	0	18	0	0	0	0	36	0
364	3	Ag. Dimitrios	AgDAu4	2015-10-21	AgDAu4	0	0	0	3	4	0	2	0	0	2	0	0	0	0	0	0	0	0	0	1	0	0	0	0	0	0	0	5	0	0	0	0	5	0	0	0	0	11	1	0	0	0	30	0
365	3	Ag. Dimitrios	AgDAu5	2015-10-21	AgDAu5	0	0	0	0	3	0	0	0	0	0	0	0	0	0	0	0	0	0	0	2	0	0	0	0	0	0	0	0	0	0	0	0	5	0	0	0	0	4	1	0	0	0	18	0
366	3	Ag. Dimitrios	AgDAu6	2015-10-21	AgDAu6	0	0	0	0	0	0	0	0	0	1	0	0	0	0	0	0	0	0	0	0	0	0	0	0	0	0	0	0	0	0	0	0	1	0	0	0	0	1	0	0	0	0	3	0
367	3	Ag. Dimitrios	AgDAu7	2015-10-21	AgDAu7	0	0	0	1	3	0	0	0	0	0	0	0	0	0	0	0	0	0	0	2	0	0	2	0	0	0	0	0	0	0	0	0	3	0	0	0	0	3	0	0	0	0	19	0
368	3	Ag. Dimitrios	AgDAu8	2015-10-21	AgDAu8	0	0	0	0	0	0	1	0	0	2	0	0	0	0	0	0	0	0	0	14	0	0	0	0	0	0	0	2	0	0	1	0	0	0	0	0	0	6	0	0	0	0	57	0
369	3	Ag. Dimitrios	AgDAu9	2015-10-21	AgDAu9	0	0	0	0	15	0	0	0	0	2	0	0	0	0	0	0	0	0	0	5	1	0	0	0	0	0	0	1	0	0	0	2	2	0	0	0	0	2	0	0	0	0	48	0
370	3	Ag. Dimitrios	AgDAu10	2015-10-21	AgDAu10	0	0	0	2	21	0	2	0	0	2	0	0	0	0	0	0	0	0	0	1	0	0	0	0	0	0	0	0	0	0	3	0	5	0	0	0	0	13	0	0	0	0	112	0
371	3	Ag. Dimitrios	AgDAu11	2015-10-21	AgDAu11	0	0	0	0	0	0	4	0	0	0	0	0	0	0	0	0	0	0	0	1	1	0	1	0	0	0	0	0	0	0	0	0	1	0	0	0	0	2	0	0	0	0	10	0
372	3	Ag. Dimitrios	AgDAu12	2015-10-21	AgDAu12	0	0	0	1	0	0	0	0	0	0	0	0	0	0	0	0	0	0	0	0	0	0	0	0	0	0	0	1	0	0	0	0	0	0	0	0	0	0	0	0	0	0	10	0
373	3	Ag. Dimitrios	AgDAu13	2015-10-21	AgDAu13	0	0	0	0	2	0	1	0	0	1	0	0	0	0	0	0	0	0	0	1	0	0	0	0	1	0	0	0	0	0	0	0	1	0	0	0	0	0	0	0	0	0	38	0
374	3	Ag. Dimitrios	AgDAu14	2015-10-21	AgDAu14	0	0	0	0	6	0	2	0	0	7	0	0	0	0	0	0	0	0	0	10	0	0	0	0	0	0	0	0	0	0	0	0	0	0	0	0	0	13	0	0	0	0	46	0
375	3	Ag. Dimitrios	AgDAu15	2015-10-21	AgDAu15	0	0	0	1	7	0	1	0	0	1	0	0	0	0	0	0	0	0	0	3	0	0	0	0	0	0	0	0	0	0	2	0	0	0	0	0	0	10	0	0	1	0	32	0
376	3	Ag. Dimitrios	AgDAu16	2015-10-21	AgDAu16	0	0	0	0	8	0	0	0	0	0	0	0	0	0	0	0	0	0	0	0	0	0	0	0	0	0	0	0	0	0	0	0	4	0	0	0	0	1	0	0	0	0	2	0
377	3	Ag. Dimitrios	AgDAu17	2015-10-21	AgDAu17	0	0	0	0	1	0	2	0	0	0	0	0	0	0	0	0	0	0	0	1	0	0	0	0	0	0	0	0	0	0	0	0	1	0	0	0	0	1	0	0	0	0	20	0
378	3	Ag. Dimitrios	AgDAu18	2015-10-21	AgDAu18	0	0	0	0	0	0	0	0	0	1	0	0	0	0	0	0	0	0	0	0	0	0	2	0	0	0	0	0	0	0	0	0	0	0	0	0	0	0	0	0	0	0	1	0
379	3	Ag. Dimitrios	AgDAu19	2015-10-21	AgDAu19	0	0	0	1	37	0	2	0	0	4	0	0	0	0	0	0	0	0	0	11	0	0	0	0	3	0	0	9	0	0	2	0	7	0	0	0	0	38	0	0	0	0	67	0
380	3	Ag. Dimitrios	AgDAu20	2015-10-21	AgDAu20	0	0	0	0	0	0	0	0	0	0	0	0	0	0	0	0	0	0	0	2	0	0	0	0	0	0	0	1	0	0	0	0	1	0	0	0	0	2	0	0	0	0	20	0
[truncated: 25 more columns]

## Sheet: Fuzzy rules database
Table S2. Hydroecological relationships based on which the fuzzy rules were developed. In case of multiple observations of the same V,D,S combination,
the FRB algorithm uses the Bayesian joint probability to select the final habitat suitability class.
Flow velocity (m/s)	Water depth (m)	Substrate type	MAXSEASON		MAXTYPE		MAXALL		MAXSITE		MAXMETRIC
			5 K classes (FRB)	3 K classes (performance)	5 K classes (FRB)	3 K classes (performance)	5 K classes (FRB)	3 K classes (performance)	5 K classes (FRB)	3 K classes (performance)	5 K classes (FRB)	3 K classes (performance)
High	Deep	Boulders	Bad	Low	Bad	Low	Bad	Low	Poor	Moderate	Poor	Moderate
High	Deep	Small stones	Bad	Low	Bad	Low	Bad	Low	Bad	Low	Moderate	Moderate
High	Moderate	Fine gravel	Bad	Low	Bad	Low	Bad	Low	Bad	Low	Moderate	Moderate
High	Moderate	Large gravel	Bad	Low	Bad	Low	Bad	Low	Poor	Moderate	Moderate	Moderate
High	Moderate	Large gravel	Bad	Low	Bad	Low	Bad	Low	Poor	Moderate	Poor	Moderate
High	Moderate	Large stones	Bad	Low	Bad	Low	Bad	Low	Poor	Moderate	Moderate	Moderate
High	Moderate	Large stones	Bad	Low	Bad	Low	Bad	Low	Poor	Moderate	Good	Acceptable
High	Moderate	Large stones	Bad	Low	Bad	Low	Bad	Low	Poor	Moderate	Good	Acceptable
High	Moderate	Large stones	Bad	Low	Poor	Moderate	Bad	Low	Moderate	Moderate	Moderate	Moderate
High	Moderate	Small stones	Bad	Low	Poor	Moderate	Bad	Low	Moderate	Moderate	Moderate	Moderate
High	Moderate	Small stones	Bad	Low	Bad	Low	Bad	Low	Poor	Moderate	Poor	Moderate
High	Moderate	Small stones	Moderate	Moderate	Moderate	Moderate	Moderate	Moderate	Moderate	Moderate	Good	Acceptable
High	Shallow	Boulders	Poor	Moderate	Poor	Moderate	Poor	Moderate	High	Acceptable	Moderate	Moderate
High	Shallow	Boulders	Bad	Low	Bad	Low	Bad	Low	Poor	Moderate	Moderate	Moderate
High	Shallow	Boulders	Bad	Low	Poor	Moderate	Bad	Low	Good	Acceptable	Moderate	Moderate
High	Shallow	Boulders	Poor	Moderate	Poor	Moderate	Poor	Moderate	High	Acceptable	Moderate	Moderate
High	Shallow	Boulders	Moderate	Moderate	Good	Acceptable	Moderate	Moderate	High	Acceptable	Moderate	Moderate
High	Shallow	Boulders	Poor	Moderate	Poor	Moderate	Poor	Moderate	Good	Acceptable	Good	Acceptable
High	Shallow	Boulders	Poor	Moderate	Moderate	Moderate	Poor	Moderate	Good	Acceptable	Good	Acceptable
High	Shallow	Large gravel	Poor	Moderate	Poor	Moderate	Poor	Moderate	Good	Acceptable	Good	Acceptable
High	Shallow	Large gravel	Bad	Low	Poor	Moderate	Bad	Low	High	Acceptable	Good	Acceptable
High	Shallow	Large gravel	Bad	Low	Bad	Low	Bad	Low	High	Acceptable	Good	Acceptable
High	Shallow	Large gravel	Poor	Moderate	Poor	Moderate	Poor	Moderate	Good	Acceptable	Good	Acceptable
High	Shallow	Large gravel	Moderate	Moderate	Moderate	Moderate	Moderate	Moderate	High	Acceptable	High	Acceptable
High	Shallow	Large stones	Poor	Moderate	Poor	Moderate	Poor	Moderate	Poor	Moderate	High	Acceptable
High	Shallow	Large stones	Bad	Low	Bad	Low	Bad	Low	Poor	Moderate	High	Acceptable
High	Shallow	Large stones	Bad	Low	Bad	Low	Bad	Low	Bad	Low	High	Acceptable
High	Shallow	Large stones	Bad	Low	Bad	Low	Bad	Low	Moderate	Moderate	High	Acceptable
High	Shallow	Large stones	Bad	Low	Poor	Moderate	Bad	Low	High	Acceptable	High	Acceptable
High	Shallow	Large stones	Bad	Low	Bad	Low	Bad	Low	Poor	Moderate	Moderate	Moderate
High	Shallow	Large stones	Bad	Low	Bad	Low	Bad	Low	High	Acceptable	High	Acceptable
High	Shallow	Large stones	Bad	Low	Bad	Low	Bad	Low	High	Acceptable	Moderate	Moderate
High	Shallow	Large stones	Poor	Moderate	Moderate	Moderate	Poor	Moderate	Good	Acceptable	Good	Acceptable
High	Shallow	Large stones	Bad	Low	Poor	Moderate	Bad	Low	Poor	Moderate	Good	Acceptable
High	Shallow	Large stones	Poor	Moderate	Poor	Moderate	Poor	Moderate	High	Acceptable	Good	Acceptable
High	Shallow	Large stones	Bad	Low	Bad	Low	Bad	Low	Bad	Low	High	Acceptable
High	Shallow	Large stones	Poor	Moderate	Poor	Moderate	Poor	Moderate	Poor	Moderate	High	Acceptable
High	Shallow	Large stones	Poor	Moderate	Poor	Moderate	Poor	Moderate	Good	Acceptable	High	Acceptable
High	Shallow	Large stones	Poor	Moderate	Moderate	Moderate	Poor	Moderate	High	Acceptable	Moderate	Moderate
High	Shallow	Large stones	Poor	Moderate	Poor	Moderate	Poor	Moderate	Poor	Moderate	Good	Acceptable
High	Shallow	Small stones	Poor	Moderate	Poor	Moderate	Poor	Moderate	Good	Acceptable	Good	Acceptable
High	Shallow	Small stones	Moderate	Moderate	Moderate	Moderate	Moderate	Moderate	Moderate	Moderate	Good	Acceptable
High	Shallow	Small stones	Poor	Moderate	Poor	Moderate	Poor	Moderate	Poor	Moderate	Good	Acceptable
High	Shallow	Small stones	Bad	Low	Bad	Low	Bad	Low	Moderate	Moderate	Good	Acceptable
High	Shallow	Small stones	Bad	Low	Bad	Low	Bad	Low	High	Acceptable	High	Acceptable
High	Shallow	Small stones	Poor	Moderate	Moderate	Moderate	Poor	Moderate	Good	Acceptable	High	Acceptable
High	Shallow	Small stones	Poor	Moderate	Poor	Moderate	Poor	Moderate	Moderate	Moderate	High	Acceptable
High	Shallow	Small stones	Moderate	Moderate	Moderate	Moderate	Moderate	Moderate	High	Acceptable	High	Acceptable
High	Shallow	Small stones	Bad	Low	Bad	Low	Bad	Low	Moderate	Moderate	Moderate	Moderate
High	Shallow	Small stones	Poor	Moderate	Poor	Moderate	Poor	Moderate	Good	Acceptable	Good	Acceptable
High	Shallow	Small stones	Poor	Moderate	Poor	Moderate	Poor	Moderate	Moderate	Moderate	Good	Acceptable
High	Shallow	Small stones	Poor	Moderate	Poor	Moderate	Poor	Moderate	Moderate	Moderate	Good	Acceptable
High	Shallow	Small stones	Moderate	Moderate	Moderate	Moderate	Moderate	Moderate	Moderate	Moderate	Good	Acceptable
High	Shallow	Small stones	Bad	Low	Bad	Low	Bad	Low	Moderate	Moderate	Good	Acceptable
High	Shallow	Small stones	Bad	Low	Bad	Low	Bad	Low	Moderate	Moderate	Good	Acceptable
High	Shallow	Small stones	Bad	Low	Bad	Low	Bad	Low	Poor	Moderate	High	Acceptable
High	Shallow	Small stones	Poor	Moderate	Bad	Low	Bad	Low	Poor	Moderate	High	Acceptable
High	Shallow	Small stones	Poor	Moderate	Bad	Low	Bad	Low	Moderate	Moderate	High	Acceptable
High	Shallow	Small stones	Poor	Moderate	Poor	Moderate	Bad	Low	Moderate	Moderate	High	Acceptable
High	Shallow	Small stones	Good	Acceptable	Poor	Moderate	Poor	Moderate	High	Acceptable	High	Acceptable
High	Shallow	Small stones	Poor	Moderate	Bad	Low	Bad	Low	Poor	Moderate	High	Acceptable
High	Very deep	Large gravel	Bad	Low	Poor	Moderate	Bad	Low	Poor	Moderate	Moderate	Moderate
High	Very deep	Large gravel	Bad	Low	Bad	Low	Bad	Low	Bad	Low	Poor	Moderate
High	Very shallow	Boulders	Poor	Moderate	Moderate	Moderate	Poor	Moderate	High	Acceptable	Good	Acceptable
High	Very shallow	Boulders	Poor	Moderate	Poor	Moderate	Poor	Moderate	Moderate	Moderate	Good	Acceptable
High	Very shallow	Boulders	Moderate	Moderate	Poor	Moderate	Poor	Moderate	High	Acceptable	High	Acceptable
High	Very shallow	Large gravel	Poor	Moderate	Poor	Moderate	Poor	Moderate	Good	Acceptable	Good	Acceptable
High	Very shallow	Large gravel	Moderate	Moderate	Poor	Moderate	Poor	Moderate	High	Acceptable	Good	Acceptable
High	Very shallow	Large stones	Poor	Moderate	Poor	Moderate	Poor	Moderate	Moderate	Moderate	Good	Acceptable
High	Very shallow	Large stones	Bad	Low	Poor	Moderate	Bad	Low	Poor	Moderate	High	Acceptable
High	Very shallow	Large stones	Poor	Moderate	Poor	Moderate	Poor	Moderate	Poor	Moderate	High	Acceptable
High	Very shallow	Small stones	Bad	Low	Poor	Moderate	Bad	Low	Poor	Moderate	High	Acceptable
High	Very shallow	Small stones	Poor	Moderate	Poor	Moderate	Poor	Moderate	Moderate	Moderate	Moderate	Moderate
High	Very shallow	Small stones	Moderate	Moderate	Moderate	Moderate	Moderate	Moderate	Moderate	Moderate	Moderate	Moderate
Low	Deep	Boulders	Bad	Low	Poor	Moderate	Bad	Low	Poor	Moderate	Moderate	Moderate
Low	Moderate	Boulders	Bad	Low	Bad	Low	Bad	Low	Poor	Moderate	Bad	Low
Low	Moderate	Boulders	Bad	Low	Bad	Low	Bad	Low	Bad	Low	Bad	Low
Low	Moderate	Boulders	Bad	Low	Bad	Low	Bad	Low	Bad	Low	Poor	Moderate
Low	Moderate	Large gravel	Bad	Low	Poor	Moderate	Bad	Low	Poor	Moderate	Poor	Moderate
Low	Moderate	Large gravel	Bad	Low	Bad	Low	Bad	Low	Poor	Moderate	Poor	Moderate
Low	Moderate	Large stones	Bad	Low	Bad	Low	Bad	Low	Poor	Moderate	Moderate	Moderate
Low	Moderate	Large stones	Bad	Low	Bad	Low	Bad	Low	Poor	Moderate	Moderate	Moderate
Low	Moderate	Large stones	Moderate	Moderate	Moderate	Moderate	Moderate	Moderate	High	Acceptable	Good	Acceptable
Low	Moderate	Medium gravel	Bad	Low	Bad	Low	Bad	Low	Bad	Low	Moderate	Moderate
Low	Moderate	Small stones	Bad	Low	Bad	Low	Bad	Low	Poor	Moderate	High	Acceptable
Low	Shallow	Boulders	Moderate	Moderate	Moderate	Moderate	Moderate	Moderate	Moderate	Moderate	Poor	Moderate
Low	Shallow	Boulders	Bad	Low	Bad	Low	Bad	Low	Moderate	Moderate	Moderate	Moderate
Low	Shallow	Boulders	Bad	Low	Bad	Low	Bad	Low	Poor	Moderate	Moderate	Moderate
Low	Shallow	Boulders	Bad	Low	Poor	Moderate	Bad	Low	Poor	Moderate	Moderate	Moderate
Low	Shallow	Boulders	Moderate	Moderate	Moderate	Moderate	Moderate	Moderate	High	Acceptable	Moderate	Moderate
Low	Shallow	Boulders	Bad	Low	Bad	Low	Bad	Low	Poor	Moderate	Good	Acceptable
Low	Shallow	Boulders	Bad	Low	Bad	Low	Bad	Low	Bad	Low	Good	Acceptable
Low	Shallow	Boulders	Moderate	Moderate	Good	Acceptable	Moderate	Moderate	Good	Acceptable	Good	Acceptable
Low	Shallow	Boulders	Poor	Moderate	Moderate	Moderate	Poor	Moderate	Moderate	Moderate	High	Acceptable
Low	Shallow	Boulders	Poor	Moderate	Poor	Moderate	Poor	Moderate	Good	Acceptable	High	Acceptable
Low	Shallow	Boulders	Bad	Low	Bad	Low	Bad	Low	Poor	Moderate	Poor	Moderate
Low	Shallow	Boulders	Good	Acceptable	High	Acceptable	Good	Acceptable	High	Acceptable	Poor	Moderate
Low	Shallow	Boulders	Poor	Moderate	Moderate	Moderate	Poor	Moderate	Moderate	Moderate	Poor	Moderate
Low	Shallow	Fine gravel	Bad	Low	Bad	Low	Bad	Low	Bad	Low	Poor	Moderate
Low	Shallow	Large gravel	Bad	Low	Bad	Low	Bad	Low	Moderate	Moderate	Moderate	Moderate
Low	Shallow	Large gravel	Bad	Low	Bad	Low	Bad	Low	Poor	Moderate	Good	Acceptable
Low	Shallow	Large gravel	Poor	Moderate	Poor	Moderate	Poor	Moderate	Poor	Moderate	Good	Acceptable
Low	Shallow	Large gravel	Moderate	Moderate	Moderate	Moderate	Moderate	Moderate	Moderate	Moderate	Good	Acceptable
Low	Shallow	Large gravel	Bad	Low	Poor	Moderate	Bad	Low	Moderate	Moderate	Good	Acceptable
Low	Shallow	Large gravel	Poor	Moderate	Moderate	Moderate	Poor	Moderate	Moderate	Moderate	Good	Acceptable
Low	Shallow	Large gravel	Good	Acceptable	Poor	Moderate	Poor	Moderate	High	Acceptable	Good	Acceptable
Low	Shallow	Large stones	Bad	Low	Bad	Low	Bad	Low	Poor	Moderate	Good	Acceptable
Low	Shallow	Large stones	Bad	Low	Bad	Low	Bad	Low	Moderate	Moderate	High	Acceptable
Low	Shallow	Large stones	Poor	Moderate	Moderate	Moderate	Poor	Moderate	Moderate	Moderate	Poor	Moderate
Low	Shallow	Large stones	Moderate	Moderate	Moderate	Moderate	Moderate	Moderate	Moderate	Moderate	Poor	Moderate
Low	Shallow	Large stones	Poor	Moderate	Poor	Moderate	Poor	Moderate	Good	Acceptable	Moderate	Moderate
Low	Shallow	Large stones	Bad	Low	Bad	Low	Bad	Low	Moderate	Moderate	Moderate	Moderate
Low	Shallow	Large stones	Bad	Low	Bad	Low	Bad	Low	Moderate	Moderate	Moderate	Moderate
Low	Shallow	Large stones	Bad	Low	Bad	Low	Bad	Low	Poor	Moderate	Moderate	Moderate
Low	Shallow	Large stones	Bad	Low	Bad	Low	Bad	Low	Bad	Low	Good	Acceptable
Low	Shallow	Large stones	Moderate	Moderate	Poor	Moderate	Poor	Moderate	High	Acceptable	Good	Acceptable
Low	Shallow	Large stones	Poor	Moderate	Bad	Low	Bad	Low	Moderate	Moderate	High	Acceptable
Low	Shallow	Large stones	Poor	Moderate	Bad	Low	Bad	Low	Poor	Moderate	High	Acceptable
Low	Shallow	Medium gravel	Moderate	Moderate	Moderate	Moderate	Moderate	Moderate	Moderate	Moderate	High	Acceptable
Low	Shallow	Medium gravel	Poor	Moderate	Poor	Moderate	Bad	Low	Good	Acceptable	Bad	Low
Low	Shallow	Medium gravel	Bad	Low	Bad	Low	Bad	Low	Bad	Low	Poor	Moderate
Low	Shallow	Small stones	Bad	Low	Bad	Low	Bad	Low	Moderate	Moderate	Moderate	Moderate
Low	Shallow	Small stones	Bad	Low	Bad	Low	Bad	Low	Bad	Low	Good	Acceptable
Low	Shallow	Small stones	Bad	Low	Poor	Moderate	Bad	Low	Poor	Moderate	Good	Acceptable
Low	Shallow	Small stones	Poor	Moderate	Moderate	Moderate	Poor	Moderate	Moderate	Moderate	Good	Acceptable
Low	Shallow	Small stones	Poor	Moderate	Poor	Moderate	Poor	Moderate	Poor	Moderate	Good	Acceptable
Low	Shallow	Small stones	Bad	Low	Bad	Low	Bad	Low	Poor	Moderate	Good	Acceptable
Low	Very deep	Large stones	Bad	Low	Bad	Low	Bad	Low	Bad	Low	Moderate	Moderate
Low	Very shallow	Boulders	Bad	Low	Bad	Low	Bad	Low	Poor	Moderate	Poor	Moderate
Low	Very shallow	Boulders	Bad	Low	Poor	Moderate	Bad	Low	Good	Acceptable	Poor	Moderate
Low	Very shallow	Large gravel	Poor	Moderate	Poor	Moderate	Poor	Moderate	High	Acceptable	Moderate	Moderate
Low	Very shallow	Large gravel	Bad	Low	Bad	Low	Bad	Low	Poor	Moderate	Good	Acceptable
Low	Very shallow	Large gravel	Poor	Moderate	Poor	Moderate	Poor	Moderate	Poor	Moderate	Moderate	Moderate
Low	Very shallow	Large gravel	Bad	Low	Bad	Low	Bad	Low	Poor	Moderate	Good	Acceptable
Low	Very shallow	Large gravel	Bad	Low	Poor	Moderate	Bad	Low	Poor	Moderate	Good	Acceptable
Low	Very shallow	Large gravel	Bad	Low	Bad	Low	Bad	Low	Poor	Moderate	High	Acceptable
Low	Very shallow	Large gravel	High	Acceptable	High	Acceptable	High	Acceptable	High	Acceptable	Moderate	Moderate
Low	Very shallow	Large gravel	Poor	Moderate	Poor	Moderate	Poor	Moderate	Poor	Moderate	Good	Acceptable
Low	Very shallow	Large stones	Poor	Moderate	Poor	Moderate	Poor	Moderate	Poor	Moderate	Good	Acceptable
Low	Very shallow	Large stones	Poor	Moderate	Poor	Moderate	Poor	Moderate	High	Acceptable	Good	Acceptable
Low	Very shallow	Large stones	Poor	Moderate	Bad	Low	Bad	Low	Poor	Moderate	High	Acceptable
Low	Very shallow	Sand	Bad	Low	Bad	Low	Bad	Low	Poor	Moderate	High	Acceptable
Low	Very shallow	Small stones	Bad	Low	Bad	Low	Bad	Low	Bad	Low	Good	Acceptable
Low	Very shallow	Small stones	Poor	Moderate	Moderate	Moderate	Poor	Moderate	Moderate	Moderate	Moderate	Moderate
Low	Very shallow	Small stones	Poor	Moderate	Poor	Moderate	Bad	Low	Moderate	Moderate	Moderate	Moderate
Moderate	Deep	Boulders	Bad	Low	Bad	Low	Bad	Low	Bad	Low	Moderate	Moderate
Moderate	Deep	Large stones	Bad	Low	Bad	Low	Bad	Low	Moderate	Moderate	Poor	Moderate
Moderate	Deep	Large stones	Bad	Low	Poor	Moderate	Bad	Low	Poor	Moderate	Good	Acceptable
Moderate	Moderate	Boulders	Bad	Low	Bad	Low	Bad	Low	Poor	Moderate	Poor	Moderate
Moderate	Moderate	Boulders	Bad	Low	Bad	Low	Bad	Low	Bad	Low	Poor	Moderate
Moderate	Moderate	Boulders	Poor	Moderate	Poor	Moderate	Bad	Low	Moderate	Moderate	Poor	Moderate
Moderate	Moderate	Large gravel	Bad	Low	Bad	Low	Bad	Low	Moderate	Moderate	Moderate	Moderate
Moderate	Moderate	Large stones	Bad	Low	Bad	Low	Bad	Low	Poor	Moderate	Good	Acceptable
Moderate	Moderate	Large stones	Bad	Low	Bad	Low	Bad	Low	Poor	Moderate	Moderate	Moderate
Moderate	Moderate	Large stones	Bad	Low	Poor	Moderate	Bad	Low	Poor	Moderate	Good	Acceptable
Moderate	Moderate	Large stones	Poor	Moderate	Poor	Moderate	Poor	Moderate	Moderate	Moderate	Moderate	Moderate
Moderate	Moderate	Large stones	Poor	Moderate	Moderate	Moderate	Poor	Moderate	Moderate	Moderate	Moderate	Moderate
Moderate	Moderate	Large stones	Bad	Low	Bad	Low	Bad	Low	Poor	Moderate	Moderate	Moderate
Moderate	Moderate	Large stones	Poor	Moderate	Poor	Moderate	Poor	Moderate	Moderate	Moderate	Good	Acceptable
Moderate	Moderate	Large stones	Poor	Moderate	Poor	Moderate	Bad	Low	Moderate	Moderate	High	Acceptable
Moderate	Moderate	Large stones	Bad	Low	Bad	Low	Bad	Low	Bad	Low	Poor	Moderate
Moderate	Moderate	Small stones	Bad	Low	Bad	Low	Bad	Low	Poor	Moderate	Moderate	Moderate
Moderate	Moderate	Small stones	Poor	Moderate	Poor	Moderate	Poor	Moderate	Moderate	Moderate	Moderate	Moderate
Moderate	Moderate	Small stones	High	Acceptable	Moderate	Moderate	Moderate	Moderate	High	Acceptable	Good	Acceptable
Moderate	Shallow	Boulders	Poor	Moderate	Poor	Moderate	Poor	Moderate	High	Acceptable	Poor	Moderate
Moderate	Shallow	Boulders	Poor	Moderate	Poor	Moderate	Poor	Moderate	Poor	Moderate	Moderate	Moderate
Moderate	Shallow	Boulders	Poor	Moderate	Poor	Moderate	Poor	Moderate	High	Acceptable	Moderate	Moderate
Moderate	Shallow	Boulders	Poor	Moderate	Poor	Moderate	Poor	Moderate	High	Acceptable	Moderate	Moderate
Moderate	Shallow	Boulders	Bad	Low	Bad	Low	Bad	Low	Poor	Moderate	Moderate	Moderate
Moderate	Shallow	Boulders	Moderate	Moderate	Moderate	Moderate	Moderate	Moderate	High	Acceptable	Good	Acceptable
Moderate	Shallow	Boulders	Poor	Moderate	Poor	Moderate	Poor	Moderate	Moderate	Moderate	Good	Acceptable
Moderate	Shallow	Boulders	Bad	Low	Poor	Moderate	Bad	Low	Moderate	Moderate	Good	Acceptable
Moderate	Shallow	Boulders	Poor	Moderate	Moderate	Moderate	Poor	Moderate	Moderate	Moderate	Good	Acceptable
Moderate	Shallow	Boulders	Poor	Moderate	Poor	Moderate	Poor	Moderate	Moderate	Moderate	Good	Acceptable
Moderate	Shallow	Boulders	Poor	Moderate	Poor	Moderate	Poor	Moderate	Good	Acceptable	Good	Acceptable
Moderate	Shallow	Boulders	Poor	Moderate	Poor	Moderate	Poor	Moderate	Good	Acceptable	High	Acceptable
Moderate	Shallow	Boulders	Bad	Low	Poor	Moderate	Bad	Low	Poor	Moderate	High	Acceptable
Moderate	Shallow	Boulders	Moderate	Moderate	Moderate	Moderate	Moderate	Moderate	Moderate	Moderate	High	Acceptable
Moderate	Shallow	Boulders	Poor	Moderate	Bad	Low	Bad	Low	Poor	Moderate	Poor	Moderate
Moderate	Shallow	Boulders	Poor	Moderate	Bad	Low	Bad	Low	Moderate	Moderate	Poor	Moderate
Moderate	Shallow	Fine gravel	Poor	Moderate	Bad	Low	Bad	Low	Poor	Moderate	Moderate	Moderate
Moderate	Shallow	Large gravel	Bad	Low	Bad	Low	Bad	Low	Poor	Moderate	Moderate	Moderate
Moderate	Shallow	Large gravel	Moderate	Moderate	Moderate	Moderate	Moderate	Moderate	Moderate	Moderate	Moderate	Moderate
Moderate	Shallow	Large gravel	Bad	Low	Bad	Low	Bad	Low	Poor	Moderate	Moderate	Moderate
Moderate	Shallow	Large gravel	Bad	Low	Bad	Low	Bad	Low	Good	Acceptable	Good	Acceptable
Moderate	Shallow	Large gravel	Bad	Low	Bad	Low	Bad	Low	Bad	Low	High	Acceptable
Moderate	Shallow	Large gravel	Bad	Low	Bad	Low	Bad	Low	Bad	Low	High	Acceptable
Moderate	Shallow	Large gravel	Bad	Low	Poor	Moderate	Bad	Low	Poor	Moderate	High	Acceptable
Moderate	Shallow	Large gravel	Moderate	Moderate	Moderate	Moderate	Moderate	Moderate	Moderate	Moderate	High	Acceptable
Moderate	Shallow	Large gravel	Bad	Low	Poor	Moderate	Bad	Low	Moderate	Moderate	High	Acceptable
Moderate	Shallow	Large gravel	Poor	Moderate	Poor	Moderate	Poor	Moderate	Good	Acceptable	High	Acceptable
Moderate	Shallow	Large gravel	Poor	Moderate	Poor	Moderate	Poor	Moderate	Moderate	Moderate	High	Acceptable
Moderate	Shallow	Large gravel	Bad	Low	Bad	Low	Bad	Low	Poor	Moderate	Moderate	Moderate
Moderate	Shallow	Large gravel	Poor	Moderate	Poor	Moderate	Poor	Moderate	Moderate	Moderate	Moderate	Moderate
Moderate	Shallow	Large gravel	Poor	Moderate	Bad	Low	Bad	Low	Poor	Moderate	Moderate	Moderate
Moderate	Shallow	Large gravel	Moderate	Moderate	Poor	Moderate	Poor	Moderate	Moderate	Moderate	Moderate	Moderate
Moderate	Shallow	Large stones	Poor	Moderate	Poor	Moderate	Poor	Moderate	Poor	Moderate	Moderate	Moderate
Moderate	Shallow	Large stones	Poor	Moderate	Poor	Moderate	Poor	Moderate	Poor	Moderate	Moderate	Moderate
Moderate	Shallow	Large stones	Bad	Low	Bad	Low	Bad	Low	Poor	Moderate	Moderate	Moderate
Moderate	Shallow	Large stones	Bad	Low	Bad	Low	Bad	Low	Poor	Moderate	Good	Acceptable
Moderate	Shallow	Large stones	Moderate	Moderate	Good	Acceptable	Moderate	Moderate	High	Acceptable	Good	Acceptable
Moderate	Shallow	Large stones	Poor	Moderate	Poor	Moderate	Poor	Moderate	Moderate	Moderate	Good	Acceptable
Moderate	Shallow	Large stones	Bad	Low	Bad	Low	Bad	Low	Poor	Moderate	Good	Acceptable
Moderate	Shallow	Large stones	Bad	Low	Poor	Moderate	Bad	Low	Poor	Moderate	Good	Acceptable
Moderate	Shallow	Large stones	Poor	Moderate	Poor	Moderate	Poor	Moderate	Moderate	Moderate	Good	Acceptable
Moderate	Shallow	Large stones	Moderate	Moderate	Moderate	Moderate	Moderate	Moderate	Good	Acceptable	Good	Acceptable
Moderate	Shallow	Large stones	Bad	Low	Bad	Low	Bad	Low	Moderate	Moderate	Good	Acceptable
Moderate	Shallow	Large stones	Bad	Low	Bad	Low	Bad	Low	Moderate	Moderate	Good	Acceptable
Moderate	Shallow	Large stones	Bad	Low	Bad	Low	Bad	Low	Moderate	Moderate	Good	Acceptable
Moderate	Shallow	Large stones	Poor	Moderate	Poor	Moderate	Poor	Moderate	High	Acceptable	Good	Acceptable
Moderate	Shallow	Large stones	Poor	Moderate	Poor	Moderate	Poor	Moderate	High	Acceptable	High	Acceptable
Moderate	Shallow	Large stones	Bad	Low	Poor	Moderate	Bad	Low	Poor	Moderate	High	Acceptable
Moderate	Shallow	Large stones	Poor	Moderate	Poor	Moderate	Poor	Moderate	Moderate	Moderate	High	Acceptable
Moderate	Shallow	Large stones	Poor	Moderate	Moderate	Moderate	Poor	Moderate	Moderate	Moderate	High	Acceptable
Moderate	Shallow	Large stones	Poor	Moderate	Moderate	Moderate	Poor	Moderate	Good	Acceptable	High	Acceptable
Moderate	Shallow	Large stones	Poor	Moderate	Poor	Moderate	Poor	Moderate	Moderate	Moderate	High	Acceptable
Moderate	Shallow	Large stones	Poor	Moderate	Poor	Moderate	Bad	Low	Moderate	Moderate	High	Acceptable
Moderate	Shallow	Large stones	Moderate	Moderate	Poor	Moderate	Bad	Low	Good	Acceptable	Moderate	Moderate
Moderate	Shallow	Large stones	Moderate	Moderate	Poor	Moderate	Poor	Moderate	Moderate	Moderate	Moderate	Moderate
Moderate	Shallow	Medium gravel	Bad	Low	Poor	Moderate	Bad	Low	Poor	Moderate	Moderate	Moderate
Moderate	Shallow	Medium gravel	Bad	Low	Bad	Low	Bad	Low	Poor	Moderate	High	Acceptable
Moderate	Shallow	Medium gravel	Poor	Moderate	Moderate	Moderate	Poor	Moderate	Moderate	Moderate	Good	Acceptable
Moderate	Shallow	Medium gravel	Poor	Moderate	Bad	Low	Bad	Low	Moderate	Moderate	Moderate	Moderate
Moderate	Shallow	Small stones	Bad	Low	Bad	Low	Bad	Low	Poor	Moderate	Moderate	Moderate
Moderate	Shallow	Small stones	Poor	Moderate	Poor	Moderate	Poor	Moderate	Good	Acceptable	Moderate	Moderate
Moderate	Shallow	Small stones	Poor	Moderate	Moderate	Moderate	Poor	Moderate	High	Acceptable	Moderate	Moderate
Moderate	Shallow	Small stones	Bad	Low	Bad	Low	Bad	Low	Moderate	Moderate	Moderate	Moderate
Moderate	Shallow	Small stones	Bad	Low	Bad	Low	Bad	Low	Good	Acceptable	Moderate	Moderate
Moderate	Shallow	Small stones	Poor	Moderate	Poor	Moderate	Poor	Moderate	Moderate	Moderate	Good	Acceptable
Moderate	Shallow	Small stones	Moderate	Moderate	Moderate	Moderate	Moderate	Moderate	High	Acceptable	Good	Acceptable
Moderate	Shallow	Small stones	Poor	Moderate	Moderate	Moderate	Poor	Moderate	Moderate	Moderate	Good	Acceptable
Moderate	Shallow	Small stones	Poor	Moderate	Poor	Moderate	Poor	Moderate	Moderate	Moderate	Good	Acceptable
Moderate	Shallow	Small stones	Poor	Moderate	Poor	Moderate	Poor	Moderate	Good	Acceptable	Good	Acceptable
Moderate	Shallow	Small stones	Bad	Low	Bad	Low	Bad	Low	Poor	Moderate	Good	Acceptable
Moderate	Shallow	Small stones	Bad	Low	Poor	Moderate	Bad	Low	Good	Acceptable	High	Acceptable
Moderate	Shallow	Small stones	Bad	Low	Poor	Moderate	Bad	Low	Good	Acceptable	High	Acceptable
Moderate	Shallow	Small stones	Poor	Moderate	Poor	Moderate	Poor	Moderate	Moderate	Moderate	High	Acceptable
Moderate	Shallow	Small stones	Bad	Low	Poor	Moderate	Bad	Low	Moderate	Moderate	High	Acceptable
Moderate	Shallow	Small stones	Good	Acceptable	Poor	Moderate	Poor	Moderate	High	Acceptable	High	Acceptable
Moderate	Shallow	Small stones	Poor	Moderate	Poor	Moderate	Bad	Low	Moderate	Moderate	High	Acceptable
Moderate	Shallow	Small stones	Moderate	Moderate	Poor	Moderate	Poor	Moderate	High	Acceptable	High	Acceptable
Moderate	Shallow	Small stones	Moderate	Moderate	Poor	Moderate	Poor	Moderate	Moderate	Moderate	High	Acceptable
Moderate	Shallow	Small stones	Poor	Moderate	Bad	Low	Bad	Low	Poor	Moderate	High	Acceptable
Moderate	Very shallow	Large gravel	Bad	Low	Bad	Low	Bad	Low	Bad	Low	Good	Acceptable
Moderate	Very shallow	Large gravel	Bad	Low	Bad	Low	Bad	Low	Good	Acceptable	Good	Acceptable
Moderate	Very shallow	Large gravel	Moderate	Moderate	Moderate	Moderate	Moderate	Moderate	Moderate	Moderate	Good	Acceptable
Moderate	Very shallow	Large gravel	Poor	Moderate	Poor	Moderate	Poor	Moderate	Poor	Moderate	Good	Acceptable
Moderate	Very shallow	Large gravel	Poor	Moderate	Poor	Moderate	Poor	Moderate	Poor	Moderate	Good	Acceptable
Moderate	Very shallow	Large gravel	Bad	Low	Poor	Moderate	Bad	Low	Moderate	Moderate	High	Acceptable
Moderate	Very shallow	Large gravel	Moderate	Moderate	Good	Acceptable	Moderate	Moderate	Good	Acceptable	Good	Acceptable
Moderate	Very shallow	Large gravel	Moderate	Moderate	Good	Acceptable	Moderate	Moderate	Good	Acceptable	High	Acceptable
Moderate	Very shallow	Large gravel	Moderate	Moderate	Good	Acceptable	Moderate	Moderate	High	Acceptable	High	Acceptable
Moderate	Very shallow	Large gravel	Poor	Moderate	Bad	Low	Bad	Low	Moderate	Moderate	Moderate	Moderate
Moderate	Very shallow	Large gravel	Moderate	Moderate	Poor	Moderate	Poor	Moderate	Good	Acceptable	Good	Acceptable
Moderate	Very shallow	Large gravel	Poor	Moderate	Bad	Low	Bad	Low	Moderate	Moderate	High	Acceptable
Moderate	Very shallow	Large gravel	Moderate	Moderate	Poor	Moderate	Poor	Moderate	High	Acceptable	Poor	Moderate
Moderate	Very shallow	Large gravel	Good	Acceptable	Poor	Moderate	Poor	Moderate	Good	Acceptable	Moderate	Moderate
Moderate	Very shallow	Large gravel	Moderate	Moderate	Poor	Moderate	Poor	Moderate	Moderate	Moderate	Good	Acceptable
Moderate	Very shallow	Large gravel	High	Acceptable	Poor	Moderate	Poor	Moderate	High	Acceptable	Good	Acceptable
Moderate	Very shallow	Large stones	Bad	Low	Bad	Low	Bad	Low	Poor	Moderate	Good	Acceptable
Moderate	Very shallow	Large stones	Bad	Low	Poor	Moderate	Bad	Low	Good	Acceptable	Good	Acceptable
Moderate	Very shallow	Large stones	Good	Acceptable	High	Acceptable	Good	Acceptable	High	Acceptable	Good	Acceptable
Moderate	Very shallow	Large stones	Bad	Low	Bad	Low	Bad	Low	Poor	Moderate	High	Acceptable
Moderate	Very shallow	Medium gravel	Poor	Moderate	Poor	Moderate	Poor	Moderate	Poor	Moderate	High	Acceptable
Moderate	Very shallow	Silt	Poor	Moderate	Moderate	Moderate	Poor	Moderate	Good	Acceptable	Moderate	Moderate
Moderate	Very shallow	Small stones	Bad	Low	Poor	Moderate	Bad	Low	Moderate	Moderate	Good	Acceptable
Moderate	Very shallow	Small stones	Poor	Moderate	Poor	Moderate	Poor	Moderate	High	Acceptable	Good	Acceptable
Moderate	Very shallow	Small stones	Poor	Moderate	Moderate	Moderate	Poor	Moderate	Moderate	Moderate	Good	Acceptable
Moderate	Very shallow	Small stones	Bad	Low	Bad	Low	Bad	Low	Poor	Moderate	High	Acceptable
Moderate	Very shallow	Small stones	Moderate	Moderate	Poor	Moderate	Poor	Moderate	Good	Acceptable	High	Acceptable
Moderate	Very shallow	Small stones	Moderate	Moderate	Poor	Moderate	Poor	Moderate	High	Acceptable	High	Acceptable
Moderate	Very shallow	Small stones	Poor	Moderate	Bad	Low	Bad	Low	Poor	Moderate	High	Acceptable
Moderate	Very shallow	Small stones	Poor	Moderate	Bad	Low	Bad	Low	Poor	Moderate	High	Acceptable
Very high	Deep	Boulders	Bad	Low	Bad	Low	Bad	Low	Bad	Low	Moderate	Moderate
Very high	Moderate	Boulders	Bad	Low	Bad	Low	Bad	Low	Poor	Moderate	Poor	Moderate
Very high	Moderate	Boulders	Bad	Low	Bad	Low	Bad	Low	Poor	Moderate	Poor	Moderate
Very high	Moderate	Boulders	Bad	Low	Bad	Low	Bad	Low	Poor	Moderate	Poor	Moderate
Very high	Moderate	Boulders	Bad	Low	Bad	Low	Bad	Low	Bad	Low	Poor	Moderate
Very high	Moderate	Large gravel	Bad	Low	Bad	Low	Bad	Low	Bad	Low	Moderate	Moderate
Very high	Moderate	Large stones	Bad	Low	Bad	Low	Bad	Low	Bad	Low	Moderate	Moderate
Very high	Moderate	Large stones	Bad	Low	Bad	Low	Bad	Low	Bad	Low	Moderate	Moderate
Very high	Moderate	Large stones	Bad	Low	Bad	Low	Bad	Low	Poor	Moderate	Moderate	Moderate
Very high	Moderate	Small stones	Bad	Low	Bad	Low	Bad	Low	Bad	Low	Good	Acceptable
Very high	Moderate	Small stones	Bad	Low	Bad	Low	Bad	Low	Bad	Low	Moderate	Moderate
Very high	Moderate	Small stones	Bad	Low	Bad	Low	Bad	Low	Poor	Moderate	Poor	Moderate
Very high	Moderate	Small stones	Poor	Moderate	Poor	Moderate	Poor	Moderate	Good	Acceptable	Poor	Moderate
Very high	Shallow	Boulders	Moderate	Moderate	Moderate	Moderate	Moderate	Moderate	Moderate	Moderate	Poor	Moderate
Very high	Shallow	Boulders	Bad	Low	Bad	Low	Bad	Low	Poor	Moderate	Poor	Moderate
Very high	Shallow	Boulders	Poor	Moderate	Moderate	Moderate	Poor	Moderate	Good	Acceptable	Poor	Moderate
Very high	Shallow	Boulders	Bad	Low	Poor	Moderate	Bad	Low	Moderate	Moderate	Moderate	Moderate
Very high	Shallow	Boulders	Poor	Moderate	Bad	Low	Bad	Low	Poor	Moderate	Good	Acceptable
Very high	Shallow	Large gravel	Poor	Moderate	Poor	Moderate	Poor	Moderate	Poor	Moderate	High	Acceptable
Very high	Shallow	Large gravel	Bad	Low	Bad	Low	Bad	Low	Moderate	Moderate	Poor	Moderate
Very high	Shallow	Large stones	Bad	Low	Bad	Low	Bad	Low	Poor	Moderate	Poor	Moderate
Very high	Shallow	Large stones	Poor	Moderate	Moderate	Moderate	Poor	Moderate	Good	Acceptable	Good	Acceptable
Very high	Shallow	Large stones	Poor	Moderate	Moderate	Moderate	Poor	Moderate	Good	Acceptable	Good	Acceptable
Very high	Shallow	Large stones	Bad	Low	Poor	Moderate	Bad	Low	Poor	Moderate	High	Acceptable
Very high	Shallow	Large stones	Poor	Moderate	Poor	Moderate	Poor	Moderate	Moderate	Moderate	Poor	Moderate
Very high	Shallow	Large stones	Moderate	Moderate	Good	Acceptable	Moderate	Moderate	High	Acceptable	Moderate	Moderate
Very high	Shallow	Large stones	Poor	Moderate	Poor	Moderate	Poor	Moderate	Good	Acceptable	Moderate	Moderate
Very high	Shallow	Large stones	Bad	Low	Bad	Low	Bad	Low	Moderate	Moderate	Moderate	Moderate
Very high	Shallow	Large stones	Bad	Low	Bad	Low	Bad	Low	Poor	Moderate	Moderate	Moderate
Very high	Shallow	Large stones	Good	Acceptable	High	Acceptable	Good	Acceptable	High	Acceptable	Moderate	Moderate
Very high	Shallow	Large stones	Poor	Moderate	Poor	Moderate	Poor	Moderate	Moderate	Moderate	Good	Acceptable
Very high	Shallow	Large stones	Moderate	Moderate	Poor	Moderate	Poor	Moderate	Good	Acceptable	Good	Acceptable
Very high	Shallow	Large stones	Poor	Moderate	Poor	Moderate	Bad	Low	Moderate	Moderate	Good	Acceptable
Very high	Shallow	Large stones	Bad	Low	Bad	Low	Bad	Low	Poor	Moderate	Good	Acceptable
Very high	Shallow	Medium gravel	Bad	Low	Poor	Moderate	Bad	Low	Moderate	Moderate	High	Acceptable
Very high	Shallow	Small stones	Poor	Moderate	Poor	Moderate	Poor	Moderate	Poor	Moderate	Good	Acceptable
Very high	Shallow	Small stones	Poor	Moderate	Poor	Moderate	Poor	Moderate	Poor	Moderate	Good	Acceptable
Very high	Shallow	Small stones	Bad	Low	Bad	Low	Bad	Low	Bad	Low	Good	Acceptable
Very high	Shallow	Small stones	Moderate	Moderate	Moderate	Moderate	Moderate	Moderate	Moderate	Moderate	Good	Acceptable
Very high	Shallow	Small stones	Bad	Low	Poor	Moderate	Bad	Low	Moderate	Moderate	High	Acceptable
Very high	Very shallow	Large stones	Poor	Moderate	Moderate	Moderate	Poor	Moderate	Moderate	Moderate	Good	Acceptable
Very low	Moderate	Large gravel	Poor	Moderate	Poor	Moderate	Poor	Moderate	Moderate	Moderate	Moderate	Moderate
Very low	Moderate	Sand	Moderate	Moderate	Good	Acceptable	Moderate	Moderate	High	Acceptable	Moderate	Moderate
Very low	Shallow	Boulders	Bad	Low	Poor	Moderate	Bad	Low	Moderate	Moderate	Moderate	Moderate
Very low	Shallow	Boulders	Poor	Moderate	Poor	Moderate	Poor	Moderate	Poor	Moderate	Moderate	Moderate
Very low	Shallow	Boulders	Bad	Low	Bad	Low	Bad	Low	Moderate	Moderate	Moderate	Moderate
Very low	Shallow	Boulders	Poor	Moderate	Poor	Moderate	Poor	Moderate	Good	Acceptable	Moderate	Moderate
Very low	Shallow	Boulders	Bad	Low	Bad	Low	Bad	Low	High	Acceptable	Good	Acceptable
Very low	Shallow	Boulders	Bad	Low	Poor	Moderate	Bad	Low	Poor	Moderate	Good	Acceptable
Very low	Shallow	Boulders	Bad	Low	Poor	Moderate	Bad	Low	Good	Acceptable	Good	Acceptable
Very low	Shallow	Boulders	Bad	Low	Bad	Low	Bad	Low	Poor	Moderate	Good	Acceptable
Very low	Shallow	Boulders	Bad	Low	Bad	Low	Bad	Low	Bad	Low	Poor	Moderate
Very low	Shallow	Boulders	Bad	Low	Bad	Low	Bad	Low	Bad	Low	Poor	Moderate
Very low	Shallow	Boulders	Bad	Low	Bad	Low	Bad	Low	Bad	Low	Poor	Moderate
Very low	Shallow	Boulders	Bad	Low	Bad	Low	Bad	Low	Bad	Low	Poor	Moderate
Very low	Shallow	Boulders	Bad	Low	Bad	Low	Bad	Low	Poor	Moderate	Moderate	Moderate
Very low	Shallow	Boulders	Bad	Low	Bad	Low	Bad	Low	Poor	Moderate	Good	Acceptable
Very low	Shallow	Boulders	Bad	Low	Bad	Low	Bad	Low	Moderate	Moderate	Good	Acceptable
Very low	Shallow	Boulders	Bad	Low	Poor	Moderate	Bad	Low	Good	Acceptable	Good	Acceptable
Very low	Shallow	Boulders	Bad	Low	Bad	Low	Bad	Low	Poor	Moderate	Good	Acceptable
Very low	Shallow	Boulders	Poor	Moderate	Poor	Moderate	Poor	Moderate	Poor	Moderate	Good	Acceptable
Very low	Shallow	Boulders	Good	Acceptable	Poor	Moderate	Poor	Moderate	High	Acceptable	High	Acceptable
Very low	Shallow	Boulders	Moderate	Moderate	Poor	Moderate	Poor	Moderate	Moderate	Moderate	Poor	Moderate
Very low	Shallow	Fine gravel	Bad	Low	Bad	Low	Bad	Low	Bad	Low	Poor	Moderate
Very low	Shallow	Fine gravel	Bad	Low	Bad	Low	Bad	Low	Bad	Low	Poor	Moderate
Very low	Shallow	Fine gravel	Poor	Moderate	Bad	Low	Bad	Low	Poor	Moderate	Poor	Moderate
Very low	Shallow	Fine gravel	Bad	Low	Bad	Low	Bad	Low	Bad	Low	Moderate	Moderate
Very low	Shallow	Large gravel	Bad	Low	Poor	Moderate	Bad	Low	Moderate	Moderate	Moderate	Moderate
Very low	Shallow	Large gravel	Bad	Low	Bad	Low	Bad	Low	Bad	Low	Moderate	Moderate
Very low	Shallow	Large gravel	Bad	Low	Poor	Moderate	Bad	Low	Poor	Moderate	Good	Acceptable
Very low	Shallow	Large gravel	Poor	Moderate	Poor	Moderate	Bad	Low	Moderate	Moderate	Good	Acceptable
Very low	Shallow	Large stones	Poor	Moderate	Poor	Moderate	Poor	Moderate	Good	Acceptable	Good	Acceptable
Very low	Shallow	Large stones	Bad	Low	Bad	Low	Bad	Low	Bad	Low	Poor	Moderate
Very low	Shallow	Large stones	Bad	Low	Bad	Low	Bad	Low	Moderate	Moderate	Moderate	Moderate
Very low	Shallow	Large stones	Bad	Low	Bad	Low	Bad	Low	Moderate	Moderate	Moderate	Moderate
Very low	Shallow	Large stones	Bad	Low	Bad	Low	Bad	Low	Poor	Moderate	Good	Acceptable
Very low	Shallow	Large stones	Poor	Moderate	Poor	Moderate	Poor	Moderate	Poor	Moderate	Moderate	Moderate
Very low	Shallow	Large stones	Moderate	Moderate	Moderate	Moderate	Moderate	Moderate	Moderate	Moderate	Good	Acceptable
Very low	Shallow	Medium gravel	Bad	Low	Bad	Low	Bad	Low	Bad	Low	Bad	Low
Very low	Shallow	Medium gravel	Bad	Low	Bad	Low	Bad	Low	Poor	Moderate	Bad	Low
Very low	Shallow	Medium gravel	Bad	Low	Bad	Low	Bad	Low	Poor	Moderate	Poor	Moderate
Very low	Shallow	Medium gravel	Poor	Moderate	Poor	Moderate	Poor	Moderate	Good	Acceptable	Poor	Moderate
Very low	Shallow	Sand	Bad	Low	Bad	Low	Bad	Low	Poor	Moderate	Moderate	Moderate
Very low	Shallow	Sand	Bad	Low	Bad	Low	Bad	Low	Poor	Moderate	Moderate	Moderate
Very low	Shallow	Sand	Poor	Moderate	Poor	Moderate	Bad	Low	Moderate	Moderate	Moderate	Moderate
Very low	Shallow	Silt	Bad	Low	Poor	Moderate	Bad	Low	Poor	Moderate	Moderate	Moderate
Very low	Shallow	Small stones	Bad	Low	Bad	Low	Bad	Low	Moderate	Moderate	Good	Acceptable
Very low	Shallow	Small stones	Bad	Low	Bad	Low	Bad	Low	Bad	Low	Good	Acceptable
Very low	Shallow	Small stones	Bad	Low	Bad	Low	Bad	Low	Bad	Low	Good	Acceptable
Very low	Shallow	Small stones	Bad	Low	Bad	Low	Bad	Low	Bad	Low	Good	Acceptable
Very low	Shallow	Small stones	Bad	Low	Bad	Low	Bad	Low	Moderate	Moderate	Good	Acceptable
Very low	Shallow	Small stones	Poor	Moderate	Bad	Low	Bad	Low	Poor	Moderate	High	Acceptable
Very low	Shallow	Small stones	Poor	Moderate	Bad	Low	Bad	Low	Moderate	Moderate	High	Acceptable
Very low	Very deep	Small stones	Bad	Low	Bad	Low	Bad	Low	Bad	Low	Poor	Moderate
Very low	Very shallow	Boulders	High	Acceptable	High	Acceptable	High	Acceptable	High	Acceptable	Bad	Low
Very low	Very shallow	Boulders	Poor	Moderate	Poor	Moderate	Poor	Moderate	Poor	Moderate	High	Acceptable
Very low	Very shallow	Boulders	Bad	Low	Bad	Low	Bad	Low	Bad	Low	High	Acceptable
Very low	Very shallow	Boulders	Moderate	Moderate	Poor	Moderate	Poor	Moderate	Moderate	Moderate	Moderate	Moderate
Very low	Very shallow	Fine gravel	Bad	Low	Bad	Low	Bad	Low	Poor	Moderate	Moderate	Moderate
Very low	Very shallow	Large stones	Poor	Moderate	Poor	Moderate	Poor	Moderate	Poor	Moderate	Moderate	Moderate
Very low	Very shallow	Large stones	Moderate	Moderate	Moderate	Moderate	Moderate	Moderate	Moderate	Moderate	Good	Acceptable
Very low	Very shallow	Large stones	Poor	Moderate	Poor	Moderate	Poor	Moderate	Poor	Moderate	High	Acceptable
Very low	Very shallow	Large stones	Bad	Low	Bad	Low	Bad	Low	Poor	Moderate	Good	Acceptable
Very low	Very shallow	Large stones	Poor	Moderate	Poor	Moderate	Poor	Moderate	Poor	Moderate	High	Acceptable
Very low	Very shallow	Medium gravel	Bad	Low	Poor	Moderate	Bad	Low	Moderate	Moderate	Poor	Moderate
Very low	Very shallow	Sand	Bad	Low	Bad	Low	Bad	Low	High	Acceptable	Poor	Moderate
Very low	Very shallow	Sand	Bad	Low	Bad	Low	Bad	Low	Bad	Low	Good	Acceptable
